# Supplementary material
Source: PubMed Central journal article supplement (PMC3675259)
Supplement: mmc1.pdf [file mmc1.pdf]

The American Journal of Human Genetics, Volume 92

**Supplemental Data**

**Detecting and Characterizing Genomic Signatures  
of Positive Selection in Global Populations**

Xuanyao Liu, Rick Tzee-Hee Ong, Esakimuthu Nisha Pillai, Abier M. Elzein, Kerrin S. Small, Taane G. Clark,  
Dominic P. Kwiatkowski, and Yik-Ying Teo

## Input Data

### Samples from Phases 2 and 3 of the International HapMap Project

Phase 2 of the International HapMap Project surveyed around 3.1 million polymorphisms in four populations from three continents<sup>1</sup>, consisting of 30 Utah parent-offspring trios from the CEPH collection with ancestry from Northern and Western Europe (CEU); 30 Yoruban trios from Ibadan, Nigeria in West Africa (YRI); 45 unrelated Han Chinese from Beijing, China (CHB) and 45 unrelated Japanese from Tokyo, Japan (JPT). In the positive selection analysis, only unrelated individuals from the four population groups were used, and this excluded the offsprings in the CEU and YRI trios, resulting in a sample size of 60 unrelated individuals in each of the two populations. Haplotypes for Phase 2 of the HapMap have been inferred with an updated version of PHASE<sup>2,3</sup> that allows genotype data from both unrelated individuals and trios to be phased, and were downloaded from the HapMap resource.

Phase 3 of the International HapMap Project surveyed 1,301 individuals from eleven populations<sup>4</sup> with two commercial genotyping microarrays: Affymetrix SNP6.0 and Illumina 1M. The two arrays assayed 2,007,788 SNPs of which 268,667 SNPs overlap between the two platforms. We considered only unrelated individuals from the eleven populations, which consisted of: (i) 53 individuals of African ancestry in Southwest USA (ASW); (ii) 113 Utah residents with Northern and Western European ancestry from the CEPH collection (CEU); (iii) 84 Han Chinese from Beijing, China (CHB); (iv) 85 Chinese in Metropolitan Denver, Colorado (CHD); (v) 88 Gujarati Indians in Houston, Texas (GIH); (vi) 86 Japanese from Tokyo, Japan (JPT); (vii) 90 Luhya from Webuye, Kenya (LWK); (viii) 50 individuals with Mexican ancestry in Los Angeles, California (MXL); (ix) 143 Maasai in Kinyawa, Kenya (MKK); (x) 88 Toscani in Italia (TSI); (xi) 113 Yoruban from Ibadan, Nigeria (YRI). A consensus set of 1,525,445 SNPs that are present across all eleven populations are used in the positive selection analysis. The phasing of the samples in HapMap Phase 3 was performed with IMPUTE v2<sup>4,5</sup> and were downloaded from the HapMap resource.

### Singapore Genome Variation Project

The Singapore Genome Variation Project (SGVP) surveyed 292 individuals from the three major ethnic groups in Singapore consisting of Chinese, Malays and Asian Indians<sup>6</sup>. Each sample was assayed on the Affymetrix SNP 6.0 and Illumina 1M genotyping microarrays, and post-QC genetic data for a final set of 96 Chinese (CHS), 89 Malays (MAS) and 83 Indians (INS) was released. This consists of 1,584,040 autosomal SNPs for CHS, 1,580,905 autosomal SNPs for MAS and 1,583,454 autosomal SNPs for INS. The SGVP samples were phased using the program *fastPHASE* (version 1.3)<sup>7</sup> and were downloaded from the SGVP resource.

**Figure S1. Power of HaploPS to Infer the Frequency of the Selected Allele**

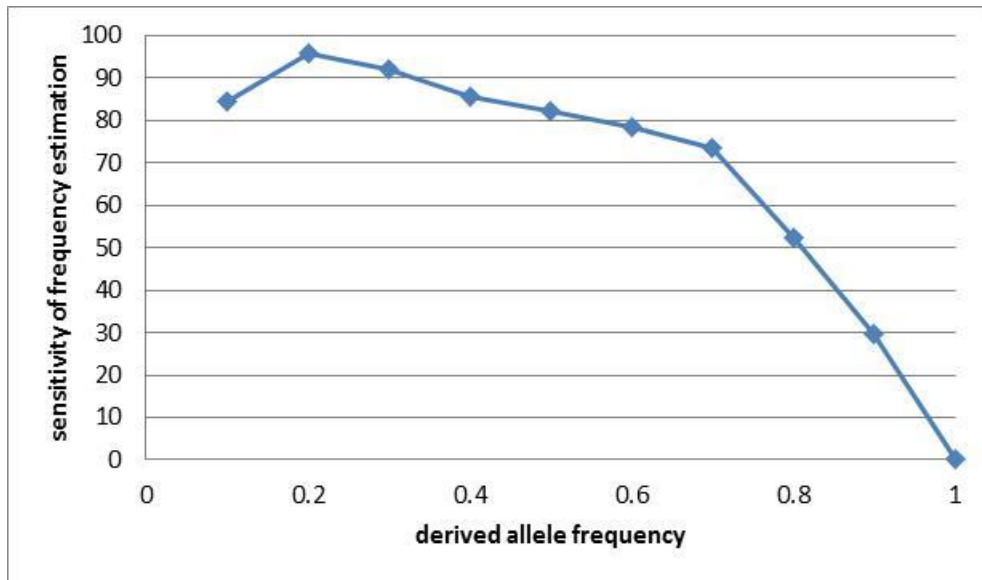

Assessment of the statistical power of haploPS to infer the frequencies of the simulated alleles under positive selection. Power here is quantified by the ability of haploPS to infer the frequency of the derived allele within 10% the actual simulation frequency out of 200 iterations at each derived allele frequency.

**Figure S2. Boxplots of the Estimated Derived Allele Frequencies**

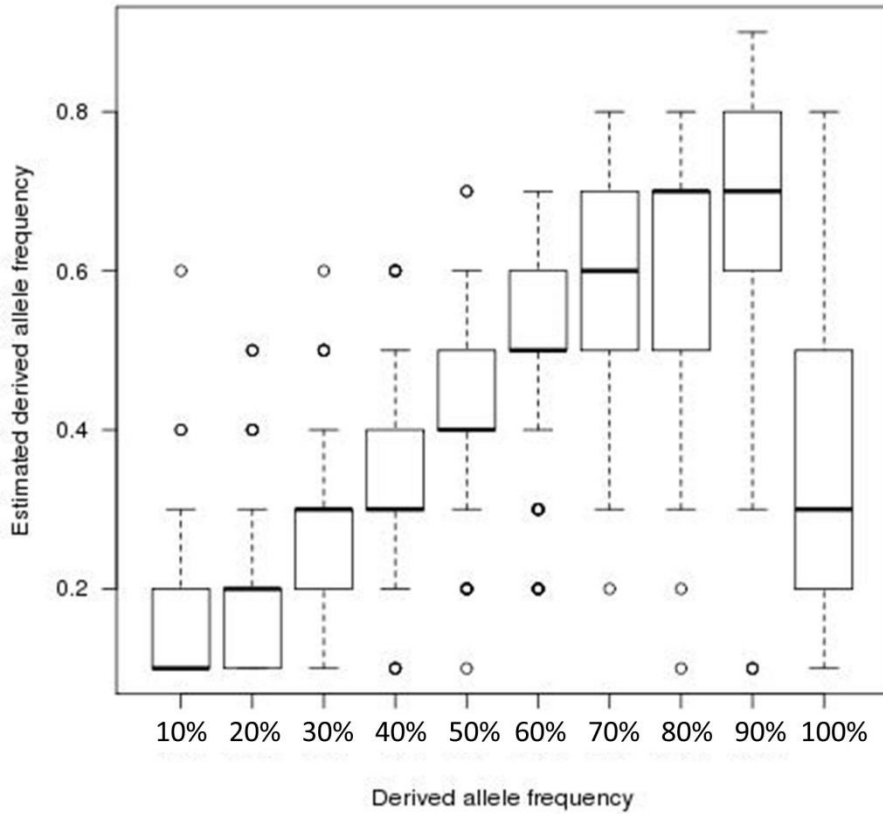

Distributions of the derived allele frequencies as estimated by haploPS, with the lower and upper edges of the each box represent the first and third quartile of the respective distribution. Each boxplot is tabulated from signals that have been successfully identified from the 200 iterations in the power simulations.

**Figure S3. Positive Control of HaploPS Definition at *HBB***

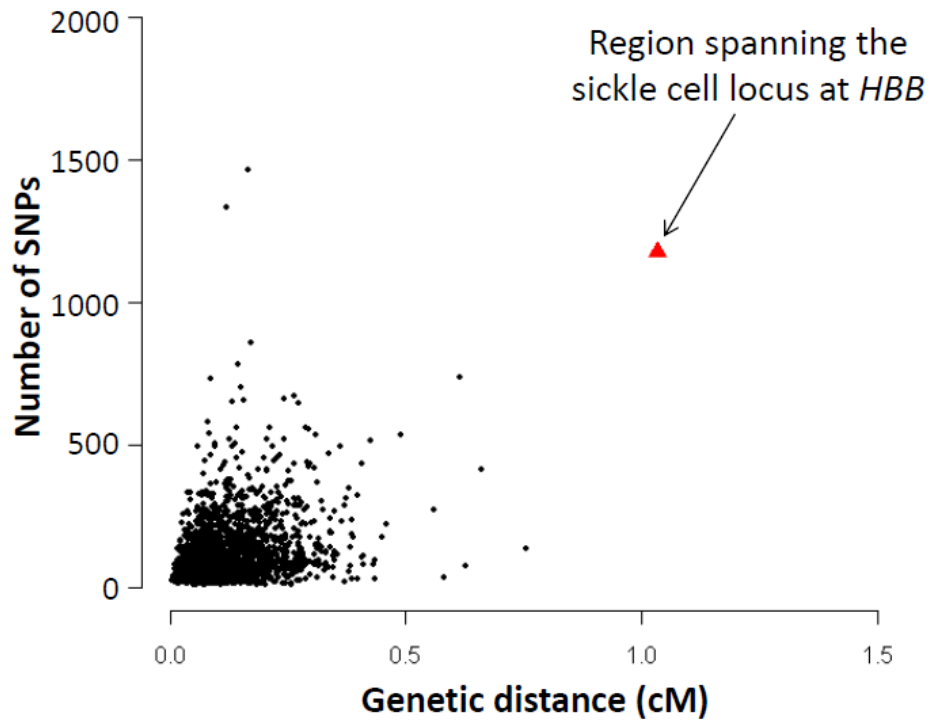

Summary of the longest haplotypes at focal SNPs on chromosome 11 in YRI, at a core haplotype frequency of 5%. HaploPS defines a signal of positive selection as a region with both long genetic distance and carrying a large number of SNPs. The positive selection signal spanning the sickle-cell locus (HbS) at *HBB* is denoted by the red triangle.

**Figure S4. Positive Selection at *HBB* and *LARGE* in Africa**

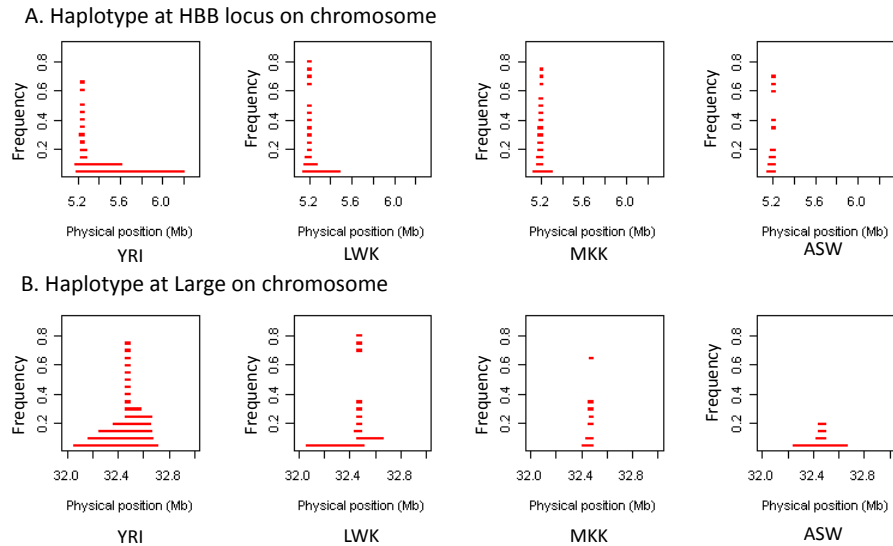

HaploPS analyses performed across a range of core haplotype frequencies from 5% to 80% at the *HBB* (panel A) and *LARGE* (panel B) loci in the four populations with African ancestry (ASW, LWK, MKK and YRI). These two positively selected loci *HBB* and *LARGE* in the Yoruba data in Phase 2 of HapMap (YRI) are well-established to be genuinely under evolutionary pressure of selection. The sickle-cell locus *HBB* is under balancing selection for the almost ten-fold protection against malaria<sup>9</sup> and the recessive sickle-cell anemia. The fitness benefit of the sickle-cell allele against childhood mortality by malaria implies the genomic background that the sickle-cell allele resides on enjoys a hitch-hiking advantage on being present in the population. This means the selection signal at *HBB* in YRI is one of the positive controls for selection metrics (Fig. S3), and the frequency of the sickle-cell allele is known to be at 12.5% in the YRI database in HapMap 2. The other known functional region is the *LARGE* locus on chromosome 22 that encodes for a protein essential for infection by the Lassa virus to cause Lassa hemorrhagic fever in Nigeria<sup>10</sup>. Together, these two regions present the strongest evidence of positive natural selection in YRI. However, these signals are not ubiquitously identified by every selection metric, especially *HBB* as the frequency of the signal is particularly low<sup>11</sup>. HaploPS successfully located the selection signals at both loci and even provided an accurate estimate of the frequency of the selected variant (Fig. 3, Fig. S4, Table S1). In addressing the origin and segregation of selection signals, we are interested to address whether any of the other three populations with African ancestry are subjected to the same evolutionary pressure as Nigerian populations in regards to malaria and Lassa hemorrhagic fever. A detailed survey of haploPS analyses suggest that there were no evidence of positive selection at either *HBB* or *LARGE* in the Kenyan Maasai in Kinyawa (MKK), and in the African American population (ASW). For the Kenyan Luhya in Webuye (LWK), there seems to be a possible long haplotype at *HBB* with a core haplotype frequency of 5%, although when assessed against the genome-wide distribution of haplotype lengths of 5% frequency in LWK, this was not defined to be empirically significant (Fig. S4). There was no evidence of a long haplotype at *LARGE* for LWK. For *LARGE*, the absence of any selection signals in the two Kenyan populations can be explained by the endemicity of Lassa fever in West Africa only, and not in East Africa. Thus, without a selective pressure exerted by the viral hemorrhagic fever, there is no genomic advantage for the beneficial mutation to persist in the population. However, the absence of positive selection at *HBB* in the

two Kenyan populations is intriguing, given that malaria is similarly endemic in East Africa. We noted that there have not been any prior reports of positive selection in the vicinity of the sickle cell locus in the HapMap3 populations of the Luhya (LWK) and the Maasai (MKK). Previous reports on the frequency of the sickle-cell allele in Kenya cited figures in the range of 6.4%<sup>11</sup> to 7.8%<sup>12,13</sup>. It is possible that the Luhya and Maasai samples in HapMap 3 did not include enough individuals who are carriers of the sickle-cell allele, given that the sickle-cell variant rs334 was not assayed in HapMap 3.

**Table S1. Regions Identified by HaploPS to Be Positively Selected in the 14 Populations**

| chr | start     | end       | gened  | pyhsd   | n.snp | adjusted haploPS score | f    | pop |
|-----|-----------|-----------|--------|---------|-------|------------------------|------|-----|
| 1   | 103182146 | 103534051 | 0.1915 | 351905  | 147   | 4.10E-02               | 0.6  | GIH |
| 1   | 103321085 | 103514336 | 0.0974 | 193251  | 71    | 1.81E-02               | 0.9  | MAS |
| 1   | 113733222 | 114260718 | 0.1161 | 527496  | 192   | 3.24E-02               | 0.4  | LWK |
| 1   | 117122430 | 117153794 | 0.1643 | 31364   | 17    | 8.55E-03               | 0.95 | INS |
| 1   | 120146624 | 120488638 | 0.4207 | 342014  | 103   | 3.01E-02               | 0.55 | MEX |
| 1   | 120272947 | 120488638 | 0.1762 | 215691  | 40    | 4.57E-02               | 0.8  | CEU |
| 1   | 120287414 | 120488638 | 0.1762 | 201224  | 30    | 4.13E-02               | 0.85 | TSI |
| 1   | 144723881 | 145368810 | 5.1537 | 644929  | 301   | 1.60E-02               | 0.2  | CHS |
| 1   | 145830625 | 149622482 | 4.2394 | 3791857 | 568   | 2.29E-02               | 0.05 | CHB |
| 1   | 145865184 | 146183314 | 1.8739 | 318130  | 3     | 4.85E-02               | 0.95 | INS |
| 1   | 146268901 | 147468611 | 1.4185 | 1199710 | 20    | 3.43E-02               | 0.7  | CEU |
| 1   | 146268901 | 147468611 | 1.4186 | 1199710 | 20    | 2.54E-02               | 0.7  | MEX |
| 1   | 146273276 | 147327306 | 1.3949 | 1054030 | 17    | 3.12E-02               | 0.75 | TSI |
| 1   | 146292711 | 149282492 | 2.6598 | 2989781 | 408   | 1.54E-02               | 0.15 | GIH |
| 1   | 153077307 | 154135249 | 0.3295 | 1057942 | 279   | 2.02E-02               | 0.55 | CHB |
| 1   | 153077751 | 153253417 | 0.1719 | 175666  | 70    | 2.28E-02               | 0.9  | JPT |
| 1   | 153084311 | 153248332 | 0.2466 | 164021  | 69    | 5.80E-03               | 0.85 | MAS |
| 1   | 164724784 | 165688387 | 1.0403 | 963603  | 533   | 1.61E-02               | 0.2  | MEX |
| 1   | 167066523 | 167096615 | 0.1763 | 30092   | 21    | 3.51E-02               | 0.95 | CHS |
| 1   | 167346043 | 167744666 | 0.2124 | 398623  | 212   | 4.57E-02               | 0.6  | MAS |
| 1   | 169265406 | 169493840 | 0.5492 | 228434  | 204   | 4.66E-02               | 0.4  | TSI |
| 1   | 170912521 | 171363586 | 0.4753 | 451065  | 147   | 3.75E-02               | 0.6  | CHB |
| 1   | 170921000 | 171203259 | 0.2808 | 282259  | 77    | 2.32E-02               | 0.8  | CHD |
| 1   | 170958743 | 171203325 | 0.2338 | 244582  | 61    | 3.30E-02               | 0.85 | JPT |
| 1   | 174678225 | 175269861 | 0.5409 | 591636  | 294   | 1.99E-02               | 0.45 | CHS |
| 1   | 174682558 | 175278023 | 0.6356 | 595465  | 274   | 7.98E-03               | 0.5  | CHB |
| 1   | 174694380 | 175266826 | 0.5247 | 572446  | 263   | 2.34E-02               | 0.5  | CHD |
| 1   | 184448779 | 184487313 | 0.0298 | 38534   | 26    | 3.68E-02               | 0.8  | LWK |
| 1   | 188022869 | 188107700 | 0.2611 | 84831   | 67    | 6.37E-03               | 0.75 | MEX |
| 1   | 197460751 | 199404123 | 2.2950 | 1943372 | 969   | 3.48E-02               | 0.05 | LWK |
| 1   | 203025773 | 203137611 | 0.1752 | 111838  | 63    | 4.14E-02               | 0.75 | TSI |
| 1   | 234751417 | 234888470 | 0.3902 | 137053  | 125   | 3.20E-02               | 0.55 | CEU |
| 1   | 243053004 | 243113535 | 0.3504 | 60531   | 25    | 2.25E-02               | 0.8  | MEX |
| 2   | 8898471   | 9145966   | 0.2268 | 247495  | 105   | 1.72E-02               | 0.65 | MEX |
| 2   | 9270479   | 9691129   | 0.1903 | 420650  | 212   | 8.93E-03               | 0.75 | CHS |
| 2   | 9464256   | 9686972   | 0.3027 | 222716  | 77    | 8.76E-03               | 0.85 | CHB |
| 2   | 9471731   | 9671890   | 0.2166 | 200159  | 65    | 2.57E-02               | 0.85 | CHD |
| 2   | 9471731   | 9654635   | 0.2097 | 182904  | 60    | 2.88E-03               | 0.95 | JPT |
| 2   | 17314637  | 17855011  | 0.1873 | 540374  | 226   | 1.61E-02               | 0.7  | JPT |
| 2   | 17321779  | 17882568  | 0.2244 | 560789  | 243   | 3.69E-03               | 0.75 | CHB |
| 2   | 17414064  | 17897251  | 0.1628 | 483187  | 209   | 1.57E-02               | 0.75 | CHD |
| 2   | 17420013  | 17897251  | 0.1911 | 477238  | 224   | 3.84E-02               | 0.6  | MAS |
| 2   | 17761807  | 17894867  | 0.1374 | 133060  | 87    | 3.68E-02               | 0.85 | CHS |
| 2   | 21536938  | 22345904  | 0.6738 | 808966  | 227   | 4.14E-02               | 0.45 | CHD |
| 2   | 21536938  | 21865421  | 0.3141 | 328483  | 117   | 4.67E-02               | 0.55 | MEX |
| 2   | 21638566  | 21726948  | 0.1629 | 88382   | 42    | 2.88E-03               | 0.9  | INS |
| 2   | 21638566  | 21769279  | 0.0730 | 130713  | 53    | 2.04E-02               | 0.9  | TSI |
| 2   | 21796630  | 22127772  | 0.2693 | 331142  | 84    | 4.81E-02               | 0.7  | MAS |
| 2   | 22202044  | 22282185  | 0.1897 | 80141   | 16    | 2.39E-02               | 0.95 | MAS |



| chr | start     | end       | gened  | pyhsd   | n.snp | adjusted haploPS score | f    | pop |
|-----|-----------|-----------|--------|---------|-------|------------------------|------|-----|
| 2   | 22230520  | 22329742  | 0.1905 | 99222   | 28    | 1.99E-02               | 0.95 | JPT |
| 2   | 23738673  | 24485626  | 0.1872 | 746953  | 214   | 4.78E-02               | 0.65 | CHD |
| 2   | 25784609  | 26108767  | 0.3245 | 324158  | 77    | 4.17E-02               | 0.75 | JPT |
| 2   | 26013878  | 26216756  | 0.2483 | 202878  | 63    | 4.57E-02               | 0.8  | CHS |
| 2   | 41414230  | 41498236  | 0.1289 | 84006   | 40    | 2.46E-02               | 0.9  | MAS |
| 2   | 43282562  | 43910360  | 0.5401 | 627798  | 344   | 1.68E-02               | 0.45 | CHD |
| 2   | 43301099  | 43710431  | 0.1705 | 409332  | 191   | 4.06E-02               | 0.65 | MAS |
| 2   | 43301270  | 43958429  | 0.5232 | 657159  | 385   | 7.78E-03               | 0.45 | CHS |
| 2   | 43766724  | 43907627  | 0.2571 | 140903  | 113   | 3.99E-02               | 0.75 | JPT |
| 2   | 59756517  | 60928565  | 1.1773 | 1172048 | 634   | 2.97E-02               | 0.05 | ASW |
| 2   | 72209026  | 73015059  | 0.2996 | 806033  | 203   | 3.16E-02               | 0.5  | TSI |
| 2   | 72209811  | 72867344  | 0.1949 | 657533  | 164   | 3.14E-04               | 0.95 | CHD |
| 2   | 72215468  | 72361148  | 0.1447 | 145680  | 65    | 7.59E-03               | 0.85 | INS |
| 2   | 72221698  | 72385119  | 0.1241 | 163421  | 68    | 4.21E-02               | 0.8  | GIH |
| 2   | 72226494  | 72867344  | 0.1278 | 640850  | 159   | 1.77E-03               | 0.95 | CHB |
| 2   | 72226494  | 72867344  | 0.1278 | 640850  | 159   | 1.73E-03               | 0.95 | JPT |
| 2   | 72353883  | 72982189  | 0.0440 | 628306  | 140   | 9.07E-03               | 0.95 | MAS |
| 2   | 72361148  | 72984675  | 0.0291 | 623527  | 137   | 4.75E-02               | 0.95 | CHS |
| 2   | 72376277  | 72847001  | 0.0088 | 470724  | 99    | 4.77E-02               | 0.9  | INS |
| 2   | 73355048  | 73975731  | 0.3602 | 620683  | 184   | 4.09E-02               | 0.45 | GIH |
| 2   | 74061870  | 74085759  | 0.3471 | 23889   | 11    | 5.27E-03               | 0.95 | INS |
| 2   | 74334167  | 74703461  | 0.1481 | 369294  | 147   | 4.44E-02               | 0.65 | TSI |
| 2   | 74342206  | 74672115  | 0.0584 | 329909  | 135   | 2.59E-02               | 0.8  | CEU |
| 2   | 82366308  | 83231718  | 0.1462 | 865410  | 276   | 4.44E-02               | 0.55 | GIH |
| 2   | 82935950  | 83474238  | 0.2047 | 538288  | 182   | 3.34E-02               | 0.7  | CHB |
| 2   | 82961206  | 83211007  | 0.0412 | 249801  | 98    | 4.11E-02               | 0.85 | INS |
| 2   | 84222108  | 84993676  | 0.6195 | 771568  | 313   | 3.50E-02               | 0.4  | CHB |
| 2   | 84403907  | 84995378  | 0.3382 | 591471  | 230   | 4.50E-02               | 0.55 | CHD |
| 2   | 84422129  | 84975918  | 0.1938 | 553789  | 222   | 4.47E-02               | 0.65 | CHS |
| 2   | 84422129  | 84995378  | 0.3221 | 573249  | 220   | 4.10E-02               | 0.6  | JPT |
| 2   | 84759174  | 84946512  | 0.2537 | 187338  | 89    | 1.70E-02               | 0.75 | MAS |
| 2   | 86292111  | 87724232  | 1.1214 | 1432121 | 255   | 3.56E-02               | 0.35 | JPT |
| 2   | 86292581  | 88092105  | 1.8349 | 1799524 | 259   | 1.15E-02               | 0.35 | CHD |
| 2   | 86414037  | 88077079  | 1.8076 | 1663042 | 184   | 3.17E-03               | 0.5  | CHB |
| 2   | 96926278  | 98000626  | 0.2049 | 1074348 | 179   | 3.57E-02               | 0.55 | GIH |
| 2   | 108279191 | 109360822 | 0.8644 | 1081631 | 432   | 2.60E-02               | 0.1  | LWK |
| 2   | 108286633 | 108910484 | 0.4048 | 623851  | 186   | 5.83E-03               | 0.7  | JPT |
| 2   | 108292004 | 108337783 | 0.2400 | 45779   | 33    | 3.31E-02               | 0.9  | CHB |
| 2   | 108309635 | 108775208 | 0.1452 | 465573  | 121   | 7.15E-03               | 0.9  | CHD |
| 2   | 108310880 | 108711916 | 0.1008 | 401036  | 125   | 2.15E-02               | 0.9  | CHS |
| 2   | 118670171 | 118715400 | 0.2891 | 45229   | 19    | 2.51E-02               | 0.95 | CHB |
| 2   | 118670171 | 118715400 | 0.2891 | 45229   | 19    | 2.52E-02               | 0.95 | CHD |
| 2   | 118670171 | 118715400 | 0.2891 | 45229   | 19    | 2.40E-02               | 0.95 | JPT |
| 2   | 118670171 | 118715400 | 0.2891 | 45229   | 19    | 2.90E-02               | 0.85 | MEX |
| 2   | 121388588 | 121448505 | 0.2279 | 59917   | 43    | 4.94E-02               | 0.75 | CEU |
| 2   | 121388588 | 121448505 | 0.2279 | 59917   | 43    | 1.42E-02               | 0.9  | CHB |
| 2   | 121388588 | 121448505 | 0.2279 | 59917   | 43    | 4.87E-02               | 0.85 | CHD |
| 2   | 121388588 | 121448505 | 0.2279 | 59917   | 43    | 3.41E-02               | 0.75 | GIH |
| 2   | 121388588 | 121448505 | 0.2279 | 59917   | 43    | 2.32E-02               | 0.9  | JPT |

| chr | start     | end       | gened  | pyhsd   | n.snp | adjusted haploPS score | f    | pop |
|-----|-----------|-----------|--------|---------|-------|------------------------|------|-----|
| 2   | 121388588 | 121446440 | 0.1226 | 57852   | 43    | 2.51E-02               | 0.9  | MAS |
| 2   | 121388588 | 121441888 | 0.2008 | 53300   | 37    | 1.21E-03               | 0.9  | MEX |
| 2   | 121388588 | 121448505 | 0.2279 | 59917   | 43    | 3.20E-02               | 0.75 | TSI |
| 2   | 125298395 | 126077652 | 0.1823 | 779257  | 278   | 1.26E-02               | 0.65 | CHS |
| 2   | 125417976 | 126070212 | 0.2022 | 652236  | 209   | 2.10E-02               | 0.7  | CHD |
| 2   | 125451613 | 126047813 | 0.1828 | 596200  | 188   | 4.25E-02               | 0.7  | JPT |
| 2   | 127669524 | 128337564 | 0.2738 | 668040  | 258   | 4.24E-02               | 0.45 | MEX |
| 2   | 130850530 | 131247669 | 0.4683 | 397139  | 25    | 2.38E-02               | 0.9  | CHB |
| 2   | 130850530 | 131247669 | 0.4683 | 397139  | 25    | 5.18E-03               | 0.95 | CHD |
| 2   | 130850530 | 131247669 | 0.4683 | 397139  | 25    | 2.86E-02               | 0.9  | JPT |
| 2   | 130859606 | 131201105 | 0.4468 | 341499  | 11    | 1.58E-02               | 0.95 | CEU |
| 2   | 130859606 | 131201105 | 0.4468 | 341499  | 11    | 1.11E-02               | 0.95 | GIH |
| 2   | 130859606 | 131198948 | 0.4295 | 339342  | 10    | 7.28E-03               | 0.95 | MEX |
| 2   | 130859606 | 131198948 | 0.4295 | 339342  | 10    | 2.12E-02               | 0.95 | TSI |
| 2   | 134098567 | 134504147 | 0.6352 | 405580  | 288   | 8.23E-03               | 0.2  | MKK |
| 2   | 135472099 | 135936301 | 0.0805 | 464202  | 143   | 1.79E-02               | 0.65 | MKK |
| 2   | 136104943 | 136505448 | 0.1419 | 400505  | 155   | 1.31E-02               | 0.75 | CEU |
| 2   | 136123915 | 136505448 | 0.1253 | 381533  | 149   | 2.98E-03               | 0.65 | MKK |
| 2   | 136797619 | 137528542 | 0.5349 | 730923  | 458   | 3.68E-03               | 0.2  | MKK |
| 2   | 137000875 | 138727290 | 1.5415 | 1726415 | 928   | 3.58E-02               | 0.05 | CEU |
| 2   | 149306956 | 149514117 | 0.2556 | 207161  | 23    | 2.03E-02               | 0.95 | CHB |
| 2   | 149306956 | 149514117 | 0.2556 | 207161  | 23    | 2.00E-02               | 0.95 | CHD |
| 2   | 149306956 | 149551286 | 0.2932 | 244330  | 33    | 2.91E-02               | 0.9  | JPT |
| 2   | 149306956 | 149551286 | 0.2932 | 244330  | 33    | 3.05E-02               | 0.75 | MEX |
| 2   | 149311497 | 149551286 | 0.1786 | 239789  | 32    | 3.05E-02               | 0.85 | GIH |
| 2   | 152198704 | 152445136 | 0.1825 | 246432  | 91    | 1.84E-02               | 0.7  | MEX |
| 2   | 157831816 | 157993623 | 0.4013 | 161807  | 65    | 3.27E-02               | 0.65 | TSI |
| 2   | 158735634 | 159294924 | 0.3378 | 559290  | 325   | 2.52E-02               | 0.4  | INS |
| 2   | 158811474 | 159285585 | 0.2194 | 474111  | 219   | 3.78E-02               | 0.5  | GIH |
| 2   | 167559968 | 168222918 | 0.7741 | 662950  | 235   | 2.94E-02               | 0.35 | CEU |
| 2   | 177356061 | 177598359 | 0.1468 | 242298  | 171   | 2.20E-02               | 0.7  | MAS |
| 2   | 177362003 | 177567092 | 0.1381 | 205089  | 142   | 4.39E-03               | 0.9  | CHD |
| 2   | 177388309 | 177567092 | 0.1323 | 178783  | 128   | 3.73E-03               | 0.95 | CHS |
| 2   | 177399743 | 177579250 | 0.1125 | 179507  | 120   | 5.26E-03               | 0.95 | CHB |
| 2   | 177400818 | 177558481 | 0.1089 | 157663  | 105   | 1.13E-02               | 0.95 | JPT |
| 2   | 177856534 | 178265165 | 0.2982 | 408631  | 221   | 3.79E-02               | 0.45 | GIH |
| 2   | 177915087 | 178265165 | 0.2146 | 350078  | 189   | 1.14E-02               | 0.65 | CEU |
| 2   | 177915087 | 178265165 | 0.2146 | 350078  | 189   | 4.15E-03               | 0.65 | TSI |
| 2   | 177934255 | 178264821 | 0.2043 | 330566  | 183   | 3.75E-03               | 0.65 | MEX |
| 2   | 190201049 | 190654845 | 0.3367 | 453796  | 177   | 3.35E-03               | 0.6  | INS |
| 2   | 190201887 | 190652296 | 0.2605 | 450409  | 179   | 3.29E-02               | 0.55 | CEU |
| 2   | 190213032 | 190656930 | 0.2889 | 443898  | 174   | 3.74E-02               | 0.5  | GIH |
| 2   | 191938312 | 192046963 | 0.2077 | 108651  | 45    | 7.81E-03               | 0.85 | CEU |
| 2   | 191938312 | 192046963 | 0.2077 | 108651  | 45    | 1.93E-03               | 0.9  | GIH |
| 2   | 191938312 | 192046963 | 0.2077 | 108651  | 45    | 9.15E-03               | 0.8  | MEX |
| 2   | 191938312 | 192046963 | 0.2077 | 108651  | 45    | 1.51E-03               | 0.9  | TSI |
| 2   | 192463422 | 192574023 | 0.3298 | 110601  | 55    | 4.68E-02               | 0.8  | JPT |
| 2   | 194601790 | 194931785 | 0.4403 | 329995  | 70    | 2.05E-02               | 0.4  | ASW |
| 2   | 194601790 | 194888312 | 0.4339 | 286522  | 59    | 4.53E-02               | 0.4  | LWK |

| chr | start     | end       | gened  | pyhsd  | n.snp | adjusted haploPS score | f    | pop |
|-----|-----------|-----------|--------|--------|-------|------------------------|------|-----|
| 2   | 194601790 | 194901244 | 0.4376 | 299454 | 62    | 2.39E-02               | 0.45 | YRI |
| 2   | 194702813 | 194855676 | 0.3558 | 152863 | 28    | 3.28E-02               | 0.9  | JPT |
| 2   | 194702813 | 194855676 | 0.3558 | 152863 | 28    | 4.13E-02               | 0.75 | MEX |
| 2   | 194702813 | 194836382 | 0.1166 | 133569 | 24    | 2.50E-02               | 0.75 | MKK |
| 2   | 194789155 | 195056515 | 0.5554 | 267360 | 62    | 2.28E-02               | 0.65 | TSI |
| 2   | 196447175 | 196778627 | 0.2161 | 331452 | 123   | 4.84E-02               | 0.6  | GIH |
| 2   | 196449571 | 196778687 | 0.2177 | 329116 | 122   | 2.46E-02               | 0.65 | CEU |
| 2   | 196982600 | 197308539 | 0.3151 | 325939 | 123   | 3.78E-02               | 0.55 | MEX |
| 2   | 197006467 | 197209016 | 0.2999 | 202549 | 83    | 1.75E-02               | 0.8  | CHB |
| 2   | 197006467 | 197209016 | 0.2999 | 202549 | 83    | 6.05E-03               | 0.85 | CHD |
| 2   | 197006467 | 197224108 | 0.3396 | 217641 | 86    | 9.94E-03               | 0.8  | CHS |
| 2   | 197010693 | 197541775 | 0.4104 | 531082 | 175   | 8.48E-03               | 0.55 | TSI |
| 2   | 197012239 | 197190293 | 0.2528 | 178054 | 66    | 1.78E-02               | 0.75 | CEU |
| 2   | 197012239 | 197231211 | 0.3058 | 218972 | 82    | 2.05E-02               | 0.8  | JPT |
| 2   | 197018052 | 197524529 | 0.2597 | 506477 | 165   | 2.28E-02               | 0.55 | GIH |
| 2   | 197018052 | 197571429 | 0.1842 | 553377 | 196   | 3.53E-02               | 0.55 | INS |
| 2   | 197018052 | 197520866 | 0.0911 | 502814 | 167   | 4.47E-02               | 0.75 | MAS |
| 2   | 197473294 | 197749763 | 0.2245 | 276469 | 124   | 1.93E-02               | 0.8  | JPT |
| 2   | 198885068 | 199007099 | 0.2184 | 122031 | 37    | 1.65E-02               | 0.9  | CHS |
| 2   | 205911536 | 205996132 | 0.2853 | 84596  | 47    | 4.67E-02               | 0.7  | CEU |
| 2   | 205969388 | 206051091 | 0.5039 | 81703  | 27    | 2.95E-03               | 0.95 | JPT |
| 2   | 205971826 | 206051091 | 0.4620 | 79265  | 25    | 4.97E-03               | 0.95 | CHB |
| 2   | 205971826 | 206051304 | 0.4631 | 79478  | 26    | 4.69E-03               | 0.95 | CHD |
| 2   | 205971826 | 206051304 | 0.4631 | 79478  | 26    | 1.32E-02               | 0.8  | MEX |
| 2   | 205996132 | 206051091 | 0.2610 | 54959  | 19    | 1.81E-02               | 0.95 | CHS |
| 2   | 205998621 | 206051304 | 0.2347 | 52683  | 16    | 3.78E-02               | 0.9  | GIH |
| 2   | 205998621 | 206051304 | 0.3155 | 52683  | 18    | 7.13E-03               | 0.9  | INS |
| 2   | 208754345 | 208801314 | 0.1824 | 46969  | 24    | 4.06E-02               | 0.9  | MAS |
| 2   | 212929356 | 213112634 | 0.2004 | 183278 | 101   | 2.45E-02               | 0.8  | CHS |
| 2   | 212966867 | 213137308 | 0.2229 | 170441 | 87    | 2.88E-02               | 0.8  | CHD |
| 2   | 212978686 | 213137308 | 0.1976 | 158622 | 85    | 4.95E-02               | 0.8  | CHB |
| 2   | 213120671 | 213265529 | 0.2551 | 144858 | 79    | 6.22E-03               | 0.85 | CHS |
| 2   | 213121476 | 213267474 | 0.2526 | 145998 | 74    | 1.59E-02               | 0.85 | JPT |
| 2   | 213130009 | 213267474 | 0.1473 | 137465 | 79    | 4.11E-02               | 0.8  | MAS |
| 2   | 218187505 | 218244054 | 0.1751 | 56549  | 31    | 9.70E-03               | 0.95 | CHS |
| 2   | 218974448 | 219391887 | 0.2793 | 417439 | 186   | 4.20E-02               | 0.5  | MEX |
| 2   | 218980048 | 219406248 | 0.2610 | 426200 | 190   | 1.52E-02               | 0.7  | CHB |
| 2   | 218980048 | 219427976 | 0.2821 | 447928 | 192   | 1.03E-02               | 0.55 | GIH |
| 2   | 218991341 | 219406248 | 0.2557 | 414907 | 187   | 3.53E-02               | 0.65 | JPT |
| 2   | 219202788 | 219391887 | 0.2307 | 189099 | 99    | 2.04E-02               | 0.8  | CHD |
| 2   | 219223187 | 219389845 | 0.1681 | 166658 | 73    | 3.28E-02               | 0.8  | MAS |
| 2   | 236862764 | 236894573 | 0.1973 | 31809  | 13    | 4.09E-02               | 0.95 | CEU |
| 2   | 236862764 | 237108998 | 0.4420 | 246234 | 93    | 1.85E-02               | 0.6  | GIH |
| 2   | 236866495 | 237075397 | 0.3594 | 208902 | 89    | 9.02E-03               | 0.65 | INS |
| 2   | 236903235 | 237067304 | 0.1598 | 164069 | 68    | 1.82E-02               | 0.85 | MAS |
| 3   | 413656    | 440476    | 0.1350 | 26820  | 26    | 1.21E-02               | 0.95 | GIH |
| 3   | 413656    | 440476    | 0.1350 | 26820  | 26    | 3.19E-02               | 0.9  | MEX |
| 3   | 413656    | 440476    | 0.1350 | 26820  | 26    | 1.58E-02               | 0.95 | TSI |
| 3   | 415028    | 440476    | 0.1377 | 25448  | 24    | 4.89E-02               | 0.9  | INS |

| chr | start     | end       | gened  | pyhsd   | n.snp | adjusted haploPS score | f    | pop |
|-----|-----------|-----------|--------|---------|-------|------------------------|------|-----|
| 3   | 1106724   | 1132509   | 0.2869 | 25785   | 13    | 4.03E-02               | 0.95 | CHS |
| 3   | 11918454  | 12463027  | 0.4991 | 544573  | 361   | 3.79E-02               | 0.3  | GIH |
| 3   | 12469794  | 12716219  | 0.1817 | 246425  | 115   | 6.97E-03               | 0.85 | CHS |
| 3   | 19090335  | 19193162  | 0.2509 | 102827  | 26    | 1.49E-02               | 0.9  | MAS |
| 3   | 19098536  | 19193162  | 0.2316 | 94626   | 21    | 3.15E-02               | 0.85 | INS |
| 3   | 25701532  | 25912179  | 0.3257 | 210647  | 77    | 3.45E-02               | 0.65 | CEU |
| 3   | 25701532  | 25873417  | 0.1881 | 171885  | 62    | 3.37E-02               | 0.75 | TSI |
| 3   | 25703411  | 26333045  | 0.4811 | 629634  | 225   | 3.19E-02               | 0.4  | GIH |
| 3   | 25817330  | 25924304  | 0.1900 | 106974  | 35    | 4.00E-02               | 0.9  | CHB |
| 3   | 25817330  | 25924304  | 0.1900 | 106974  | 35    | 3.41E-02               | 0.9  | CHD |
| 3   | 25899702  | 26304269  | 0.3095 | 404567  | 149   | 2.15E-02               | 0.55 | TSI |
| 3   | 25905208  | 26106154  | 0.2226 | 200946  | 65    | 2.98E-02               | 0.85 | JPT |
| 3   | 25905266  | 25967254  | 0.3826 | 61988   | 22    | 5.62E-03               | 0.95 | CHS |
| 3   | 25912179  | 26314085  | 0.1693 | 401906  | 144   | 1.19E-02               | 0.75 | MAS |
| 3   | 25937362  | 26170980  | 0.1056 | 233618  | 74    | 1.88E-02               | 0.95 | CHB |
| 3   | 27002501  | 27573522  | 0.2282 | 571021  | 212   | 2.82E-02               | 0.65 | CHD |
| 3   | 44121527  | 44923774  | 0.3341 | 802247  | 237   | 2.73E-02               | 0.6  | JPT |
| 3   | 44172262  | 45089306  | 0.1480 | 917044  | 295   | 3.34E-02               | 0.65 | CHB |
| 3   | 44173853  | 45072513  | 0.1375 | 898660  | 283   | 2.78E-02               | 0.65 | CHD |
| 3   | 48393218  | 52043776  | 0.4605 | 3650558 | 986   | 2.39E-02               | 0.2  | MEX |
| 3   | 48608249  | 49334947  | 0.0359 | 726698  | 167   | 1.85E-02               | 0.9  | GIH |
| 3   | 48633471  | 49710750  | 0.0425 | 1077279 | 316   | 3.98E-02               | 0.55 | INS |
| 3   | 48694642  | 49696536  | 0.0718 | 1001894 | 297   | 5.56E-03               | 0.9  | CHS |
| 3   | 48696044  | 49713949  | 0.0411 | 1017905 | 230   | 4.32E-02               | 0.85 | CHB |
| 3   | 48696044  | 49710750  | 0.0409 | 1014706 | 229   | 1.86E-02               | 0.9  | CHD |
| 3   | 48696044  | 49713949  | 0.0411 | 1017905 | 230   | 2.11E-02               | 0.85 | JPT |
| 3   | 48794672  | 49710750  | 0.0259 | 916078  | 263   | 2.13E-02               | 0.85 | MAS |
| 3   | 49811711  | 52045995  | 0.3436 | 2234284 | 632   | 3.54E-02               | 0.25 | GIH |
| 3   | 58038371  | 58132899  | 0.1129 | 94528   | 67    | 2.05E-02               | 0.95 | JPT |
| 3   | 71495528  | 71720870  | 0.2967 | 225342  | 92    | 1.66E-02               | 0.8  | JPT |
| 3   | 72991962  | 73054439  | 0.1591 | 62477   | 30    | 3.57E-02               | 0.95 | JPT |
| 3   | 81566114  | 82116868  | 0.1650 | 550754  | 204   | 4.90E-02               | 0.55 | INS |
| 3   | 88179714  | 88379497  | 0.1353 | 199783  | 66    | 2.77E-02               | 0.8  | INS |
| 3   | 97669944  | 98810257  | 0.2628 | 1140313 | 268   | 4.67E-02               | 0.55 | CHB |
| 3   | 98390686  | 98792499  | 0.0819 | 401813  | 93    | 4.24E-02               | 0.8  | GIH |
| 3   | 100857841 | 101536850 | 0.1555 | 679009  | 274   | 4.78E-02               | 0.25 | ASW |
| 3   | 103385279 | 103498009 | 0.3874 | 112730  | 22    | 9.49E-03               | 0.95 | CHB |
| 3   | 103385279 | 103457196 | 0.2893 | 71917   | 15    | 4.79E-02               | 0.95 | CHD |
| 3   | 103385279 | 103457196 | 0.2128 | 71917   | 17    | 4.27E-02               | 0.95 | CHS |
| 3   | 103385279 | 103678351 | 0.5088 | 293072  | 70    | 4.05E-02               | 0.6  | GIH |
| 3   | 103385279 | 103457196 | 0.2893 | 71917   | 15    | 4.75E-02               | 0.95 | JPT |
| 3   | 103385279 | 103677465 | 0.1841 | 292186  | 81    | 1.77E-02               | 0.8  | MAS |
| 3   | 106127254 | 106288374 | 0.2074 | 161120  | 97    | 2.28E-02               | 0.75 | MAS |
| 3   | 106133970 | 106323341 | 0.1889 | 189371  | 98    | 3.54E-02               | 0.8  | CHD |
| 3   | 108708626 | 109044673 | 0.2407 | 336047  | 131   | 1.91E-02               | 0.7  | MAS |
| 3   | 108708695 | 109038156 | 0.1502 | 329461  | 109   | 2.72E-02               | 0.85 | CHD |
| 3   | 108715787 | 109037143 | 0.1474 | 321356  | 106   | 1.47E-02               | 0.9  | CHB |
| 3   | 108716017 | 108944421 | 0.1184 | 228404  | 82    | 2.29E-02               | 0.9  | CHS |
| 3   | 111990953 | 112312597 | 0.1880 | 321644  | 90    | 2.74E-02               | 0.7  | TSI |

| chr | start     | end       | gened  | pyhsd   | n.snp | adjusted haploPS score | f    | pop |
|-----|-----------|-----------|--------|---------|-------|------------------------|------|-----|
| 3   | 112000633 | 112415016 | 0.2391 | 414383  | 108   | 2.04E-02               | 0.65 | GIH |
| 3   | 112008263 | 112415016 | 0.2306 | 406753  | 107   | 5.36E-03               | 0.75 | CEU |
| 3   | 120874113 | 123188532 | 1.6210 | 2314419 | 860   | 1.60E-02               | 0.1  | MEX |
| 3   | 121630988 | 121909440 | 0.8449 | 278452  | 68    | 3.27E-02               | 0.65 | CHB |
| 3   | 124935751 | 125005136 | 0.2133 | 69385   | 33    | 2.03E-02               | 0.85 | CEU |
| 3   | 124935751 | 125005136 | 0.2134 | 69385   | 33    | 4.62E-02               | 0.8  | TSI |
| 3   | 130551345 | 131129379 | 0.3213 | 578034  | 224   | 2.54E-02               | 0.5  | CEU |
| 3   | 136774788 | 138242936 | 0.5137 | 1468148 | 385   | 3.21E-02               | 0.4  | CHD |
| 3   | 136776805 | 137409312 | 0.4193 | 632507  | 165   | 3.95E-02               | 0.6  | CHB |
| 3   | 136855017 | 136908456 | 0.2486 | 53439   | 13    | 2.13E-02               | 0.95 | MAS |
| 3   | 137452445 | 138173081 | 0.0851 | 720636  | 240   | 1.66E-02               | 0.7  | MAS |
| 3   | 140513473 | 140730216 | 0.1717 | 216743  | 106   | 4.26E-02               | 0.8  | CHD |
| 3   | 140513473 | 140726150 | 0.1613 | 212677  | 104   | 2.30E-02               | 0.85 | JPT |
| 3   | 140514463 | 140730216 | 0.1577 | 215753  | 122   | 3.77E-02               | 0.8  | CHS |
| 3   | 142152832 | 142247462 | 0.0828 | 94630   | 37    | 4.26E-02               | 0.9  | INS |
| 3   | 142156882 | 142257543 | 0.1284 | 100661  | 35    | 2.76E-02               | 0.9  | GIH |
| 3   | 176705455 | 176973364 | 0.2819 | 267909  | 96    | 3.81E-02               | 0.75 | JPT |
| 3   | 176705455 | 176990147 | 0.7478 | 284692  | 116   | 4.87E-02               | 0.5  | MAS |
| 3   | 176707153 | 176980160 | 0.4440 | 273007  | 114   | 3.92E-02               | 0.65 | CHS |
| 3   | 176750257 | 176993163 | 0.4370 | 242906  | 83    | 3.58E-02               | 0.7  | CHB |
| 3   | 181834498 | 181856917 | 0.3775 | 22419   | 7     | 3.81E-02               | 0.95 | MAS |
| 3   | 190126423 | 190162775 | 0.2536 | 36352   | 24    | 3.38E-02               | 0.85 | TSI |
| 3   | 190129902 | 190162775 | 0.1508 | 32873   | 23    | 1.65E-02               | 0.95 | CEU |
| 3   | 196411317 | 196886423 | 0.4665 | 475106  | 80    | 3.98E-02               | 0.7  | CHD |
| 3   | 198784962 | 199049392 | 0.4210 | 264430  | 62    | 4.03E-02               | 0.75 | CHB |
| 3   | 198819718 | 199050651 | 0.3952 | 230933  | 52    | 1.02E-02               | 0.8  | MAS |
| 4   | 16362961  | 16426378  | 0.1574 | 63417   | 26    | 3.96E-02               | 0.9  | CEU |
| 4   | 28546678  | 28738406  | 0.1782 | 191728  | 92    | 3.83E-02               | 0.75 | MAS |
| 4   | 29512150  | 29765991  | 0.3786 | 253841  | 77    | 3.32E-02               | 0.6  | MEX |
| 4   | 29791393  | 29999351  | 0.3623 | 207958  | 83    | 3.08E-02               | 0.6  | INS |
| 4   | 32843099  | 34026565  | 0.6883 | 1183466 | 283   | 4.42E-02               | 0.4  | CHS |
| 4   | 32985041  | 33087910  | 0.6371 | 102869  | 35    | 1.37E-02               | 0.85 | CHB |
| 4   | 32986285  | 33099678  | 0.6352 | 113393  | 35    | 2.90E-02               | 0.45 | ASW |
| 4   | 32986285  | 33099678  | 0.6352 | 113393  | 35    | 2.30E-02               | 0.7  | CEU |
| 4   | 32986285  | 33087910  | 0.6332 | 101625  | 34    | 1.11E-02               | 0.85 | CHD |
| 4   | 32986285  | 33087910  | 0.6332 | 101625  | 34    | 1.60E-02               | 0.85 | JPT |
| 4   | 32986285  | 33099678  | 0.6352 | 113393  | 35    | 4.91E-02               | 0.65 | MEX |
| 4   | 32986285  | 33099678  | 0.6352 | 113393  | 35    | 1.69E-02               | 0.5  | MKK |
| 4   | 33059304  | 33099678  | 0.4870 | 40374   | 8     | 3.04E-02               | 0.95 | TSI |
| 4   | 33099678  | 34525359  | 0.6171 | 1425681 | 340   | 2.90E-02               | 0.4  | CHB |
| 4   | 33159145  | 34025092  | 0.2676 | 865947  | 172   | 4.74E-02               | 0.5  | INS |
| 4   | 33319009  | 34218766  | 0.2669 | 899757  | 203   | 3.78E-02               | 0.5  | MEX |
| 4   | 33319755  | 34025092  | 0.1386 | 705337  | 122   | 1.05E-02               | 0.75 | GIH |
| 4   | 33589951  | 34025092  | 0.1227 | 435141  | 78    | 4.83E-02               | 0.8  | CEU |
| 4   | 33761093  | 34041146  | 0.1610 | 280053  | 54    | 3.92E-02               | 0.8  | TSI |
| 4   | 41515032  | 41865830  | 0.2515 | 350798  | 148   | 8.17E-04               | 0.9  | CHS |
| 4   | 41515452  | 41811551  | 0.3306 | 296099  | 108   | 3.66E-04               | 0.95 | CHB |
| 4   | 41515452  | 41805211  | 0.3286 | 289759  | 97    | 2.16E-03               | 0.9  | JPT |
| 4   | 41521093  | 41860745  | 0.1538 | 339652  | 143   | 2.37E-02               | 0.65 | INS |

| chr | start     | end       | gened  | pyhsd   | n.snp | adjusted haploPS score | f    | pop |
|-----|-----------|-----------|--------|---------|-------|------------------------|------|-----|
| 4   | 41536091  | 41869567  | 0.1700 | 333476  | 128   | 1.41E-02               | 0.7  | GIH |
| 4   | 41544763  | 41895846  | 0.3390 | 351083  | 131   | 3.15E-02               | 0.55 | TSI |
| 4   | 41589703  | 41805211  | 0.1002 | 215508  | 73    | 4.08E-02               | 0.8  | MEX |
| 4   | 41596774  | 41891962  | 0.2970 | 295188  | 115   | 1.29E-02               | 0.65 | CEU |
| 4   | 41609348  | 41808557  | 0.0917 | 199209  | 76    | 2.35E-02               | 0.95 | CHD |
| 4   | 41629343  | 41701960  | 0.1209 | 72617   | 33    | 7.97E-03               | 0.95 | MAS |
| 4   | 45743877  | 47892524  | 0.9681 | 2148647 | 768   | 3.69E-02               | 0.05 | ASW |
| 4   | 53360612  | 54789386  | 1.2084 | 1428774 | 662   | 2.09E-02               | 0.05 | ASW |
| 4   | 55724939  | 55874640  | 0.3554 | 149701  | 60    | 2.02E-02               | 0.7  | CEU |
| 4   | 55724939  | 55874640  | 0.3554 | 149701  | 60    | 3.49E-02               | 0.65 | MEX |
| 4   | 60541497  | 60931841  | 0.1966 | 390344  | 129   | 4.81E-02               | 0.6  | MEX |
| 4   | 60541497  | 60888130  | 0.1741 | 346633  | 107   | 2.65E-02               | 0.7  | TSI |
| 4   | 68727369  | 68808109  | 0.2233 | 80740   | 32    | 2.62E-02               | 0.9  | CHS |
| 4   | 71739848  | 71786731  | 0.1821 | 46883   | 22    | 2.78E-02               | 0.95 | CHS |
| 4   | 76711587  | 77053289  | 0.3522 | 341702  | 159   | 3.16E-02               | 0.6  | MAS |
| 4   | 79707294  | 80104287  | 0.2654 | 396993  | 147   | 1.35E-02               | 0.6  | TSI |
| 4   | 80164473  | 80327205  | 0.3230 | 162732  | 56    | 1.39E-02               | 0.8  | MAS |
| 4   | 80168007  | 80408129  | 0.3629 | 240122  | 77    | 5.47E-03               | 0.7  | INS |
| 4   | 81426987  | 82160480  | 0.3010 | 733493  | 206   | 2.18E-02               | 0.5  | MEX |
| 4   | 81433599  | 82190265  | 0.2337 | 756666  | 224   | 2.42E-02               | 0.55 | CEU |
| 4   | 99808544  | 102349248 | 1.1372 | 2540704 | 1284  | 4.92E-02               | 0.05 | MAS |
| 4   | 100103668 | 100548716 | 0.2712 | 445048  | 268   | 1.89E-02               | 0.6  | JPT |
| 4   | 100195669 | 101415496 | 0.9469 | 1219827 | 586   | 5.75E-03               | 0.1  | LWK |
| 4   | 106708008 | 107092002 | 0.3106 | 383994  | 153   | 2.25E-02               | 0.55 | MEX |
| 4   | 106708112 | 107097080 | 0.3150 | 388968  | 154   | 3.70E-03               | 0.8  | CHB |
| 4   | 106708112 | 107106612 | 0.3405 | 398500  | 155   | 2.39E-03               | 0.8  | CHD |
| 4   | 106724392 | 107092002 | 0.1509 | 367610  | 171   | 6.35E-03               | 0.85 | CHS |
| 4   | 106725693 | 107097080 | 0.3005 | 371387  | 146   | 3.71E-02               | 0.55 | CEU |
| 4   | 106727975 | 107016278 | 0.1535 | 288303  | 121   | 7.79E-03               | 0.75 | GIH |
| 4   | 106727975 | 106891647 | 0.1562 | 163672  | 84    | 2.32E-02               | 0.8  | MAS |
| 4   | 106735477 | 107092002 | 0.1116 | 356525  | 141   | 3.84E-02               | 0.85 | JPT |
| 4   | 109730949 | 111434015 | 2.0368 | 1703066 | 771   | 2.71E-02               | 0.05 | GIH |
| 4   | 135551435 | 135768238 | 0.0991 | 216803  | 65    | 2.95E-02               | 0.95 | CHB |
| 4   | 135551435 | 135768238 | 0.0991 | 216803  | 65    | 3.21E-02               | 0.95 | JPT |
| 4   | 135640588 | 135700560 | 0.1774 | 59972   | 30    | 2.02E-02               | 0.9  | MAS |
| 4   | 143137205 | 143449084 | 0.2942 | 311879  | 168   | 2.21E-02               | 0.55 | TSI |
| 4   | 143139928 | 143448364 | 0.2894 | 308436  | 162   | 1.10E-02               | 0.6  | CEU |
| 4   | 143645481 | 144496236 | 0.3382 | 850755  | 264   | 2.58E-02               | 0.55 | CHB |
| 4   | 143656669 | 144161308 | 0.2947 | 504639  | 154   | 4.79E-02               | 0.65 | CHD |
| 4   | 143656669 | 144476163 | 0.2764 | 819494  | 265   | 4.31E-02               | 0.55 | CHS |
| 4   | 143802374 | 144641172 | 0.3094 | 838798  | 265   | 1.60E-02               | 0.6  | JPT |
| 4   | 158643549 | 158909796 | 0.3038 | 266247  | 111   | 2.04E-02               | 0.6  | MEX |
| 4   | 158831135 | 160094038 | 0.9408 | 1262903 | 375   | 2.82E-02               | 0.3  | CHB |
| 4   | 158949009 | 159353131 | 0.4001 | 404122  | 133   | 3.54E-02               | 0.65 | JPT |
| 4   | 158957384 | 159348081 | 0.4124 | 390697  | 146   | 2.48E-02               | 0.65 | CHS |
| 4   | 158957384 | 159348067 | 0.4320 | 390683  | 146   | 2.08E-02               | 0.6  | MAS |
| 4   | 158960909 | 159390104 | 0.4014 | 429195  | 138   | 2.90E-02               | 0.65 | CHD |
| 4   | 159414320 | 159999694 | 0.3895 | 585374  | 174   | 4.39E-02               | 0.55 | MAS |
| 4   | 165712136 | 165779292 | 0.2656 | 67156   | 29    | 3.58E-02               | 0.8  | GIH |

| chr | start     | end       | gened  | pyhsd   | n.snp | adjusted haploPS score | f    | pop |
|-----|-----------|-----------|--------|---------|-------|------------------------|------|-----|
| 4   | 165712136 | 165778796 | 0.2440 | 66660   | 28    | 3.54E-02               | 0.8  | MEX |
| 4   | 165737752 | 165779292 | 0.2066 | 41540   | 14    | 4.57E-02               | 0.9  | INS |
| 4   | 170409932 | 170949741 | 0.3670 | 539809  | 173   | 2.21E-02               | 0.65 | JPT |
| 4   | 170432455 | 171014643 | 0.4826 | 582188  | 188   | 3.44E-02               | 0.55 | CHD |
| 4   | 170439942 | 170998573 | 0.3386 | 558631  | 179   | 2.49E-02               | 0.5  | MEX |
| 4   | 176457478 | 176722600 | 0.2497 | 265122  | 70    | 1.62E-02               | 0.75 | CEU |
| 5   | 11790940  | 11893590  | 0.1817 | 102650  | 58    | 3.04E-03               | 0.85 | INS |
| 5   | 11796161  | 11902590  | 0.1129 | 106429  | 58    | 2.11E-03               | 0.95 | CEU |
| 5   | 11796161  | 11902590  | 0.1129 | 106429  | 58    | 3.84E-02               | 0.85 | GIH |
| 5   | 11796161  | 11902590  | 0.1129 | 106429  | 58    | 1.08E-02               | 0.85 | MEX |
| 5   | 11796161  | 11902590  | 0.1129 | 106429  | 58    | 4.77E-03               | 0.9  | TSI |
| 5   | 15008153  | 16638349  | 1.3624 | 1630196 | 731   | 3.38E-02               | 0.05 | MKK |
| 5   | 38471062  | 38509906  | 0.1853 | 38844   | 19    | 4.18E-02               | 0.9  | GIH |
| 5   | 41665720  | 43748636  | 0.5697 | 2082916 | 667   | 4.65E-02               | 0.25 | CHD |
| 5   | 43652877  | 43740313  | 0.0144 | 87436   | 25    | 4.80E-02               | 0.8  | MKK |
| 5   | 43822280  | 43983865  | 0.0359 | 161585  | 36    | 4.82E-02               | 0.7  | MKK |
| 5   | 56766427  | 56785344  | 0.7338 | 18917   | 10    | 1.68E-02               | 0.9  | CHS |
| 5   | 97055633  | 97284375  | 0.2851 | 228742  | 65    | 1.64E-02               | 0.7  | MEX |
| 5   | 109032696 | 109270627 | 0.2003 | 237931  | 88    | 4.10E-02               | 0.4  | ASW |
| 5   | 109040175 | 109271870 | 0.1999 | 231695  | 88    | 2.10E-02               | 0.45 | MKK |
| 5   | 109630568 | 110382458 | 0.3215 | 751890  | 262   | 8.59E-03               | 0.5  | MEX |
| 5   | 109637952 | 110264681 | 0.1771 | 626729  | 219   | 2.17E-03               | 0.7  | GIH |
| 5   | 109637952 | 110426932 | 0.2316 | 788980  | 274   | 4.77E-03               | 0.6  | TSI |
| 5   | 109641683 | 110264681 | 0.0630 | 622998  | 240   | 3.12E-02               | 0.65 | INS |
| 5   | 109651498 | 109875243 | 0.0563 | 223745  | 89    | 4.62E-02               | 0.85 | CEU |
| 5   | 111976016 | 113082398 | 0.8651 | 1106382 | 629   | 4.24E-02               | 0.2  | JPT |
| 5   | 112716022 | 113162918 | 0.3104 | 446896  | 284   | 1.85E-02               | 0.45 | INS |
| 5   | 115398981 | 115753690 | 0.2345 | 354709  | 208   | 1.91E-02               | 0.55 | TSI |
| 5   | 117373324 | 117689639 | 0.2497 | 316315  | 130   | 3.61E-04               | 0.95 | CHD |
| 5   | 117375429 | 117596426 | 0.1587 | 220997  | 96    | 3.49E-03               | 0.95 | CHB |
| 5   | 117375429 | 117701041 | 0.2916 | 325612  | 158   | 1.32E-04               | 0.95 | CHS |
| 5   | 117375429 | 117592166 | 0.1560 | 216737  | 94    | 3.74E-03               | 0.95 | JPT |
| 5   | 117553872 | 117690181 | 0.0709 | 136309  | 68    | 4.62E-02               | 0.9  | MAS |
| 5   | 119697356 | 119896183 | 0.1935 | 198827  | 75    | 2.88E-02               | 0.85 | CHB |
| 5   | 119725911 | 119896183 | 0.2260 | 170272  | 79    | 2.79E-03               | 0.9  | CHS |
| 5   | 124389487 | 124519221 | 0.2407 | 129734  | 71    | 4.68E-02               | 0.8  | CHB |
| 5   | 129475677 | 131360659 | 0.2958 | 1884982 | 501   | 2.60E-02               | 0.35 | CEU |
| 5   | 129718181 | 131368130 | 0.1740 | 1649949 | 425   | 4.42E-02               | 0.45 | TSI |
| 5   | 134875534 | 137766939 | 2.0471 | 2891405 | 1371  | 9.69E-03               | 0.05 | LWK |
| 5   | 142148160 | 142402160 | 0.3717 | 254000  | 167   | 3.70E-02               | 0.5  | CEU |
| 5   | 142219472 | 142481021 | 0.3523 | 261549  | 165   | 3.93E-02               | 0.5  | TSI |
| 6   | 9632690   | 9873879   | 0.2846 | 241189  | 97    | 2.67E-02               | 0.75 | CHS |
| 6   | 25308447  | 28900456  | 1.3335 | 3592009 | 1819  | 1.33E-02               | 0.05 | GIH |
| 6   | 26232282  | 26662947  | 0.2731 | 430665  | 311   | 3.94E-02               | 0.55 | JPT |
| 6   | 26433867  | 27407504  | 0.2583 | 973637  | 375   | 2.47E-02               | 0.5  | CHD |
| 6   | 26445243  | 27293771  | 0.3237 | 848528  | 398   | 7.48E-03               | 0.4  | INS |
| 6   | 26449041  | 27404491  | 0.2393 | 955450  | 444   | 1.78E-02               | 0.5  | CHS |
| 6   | 26586906  | 27301074  | 0.0666 | 714168  | 236   | 4.66E-02               | 0.65 | MAS |
| 6   | 26661252  | 29937545  | 0.6745 | 3276293 | 1872  | 2.23E-02               | 0.05 | MKK |

| chr | start     | end       | gened  | pyhsd   | n.snp | adjusted haploPS score | f    | pop |
|-----|-----------|-----------|--------|---------|-------|------------------------|------|-----|
| 6   | 27458360  | 28569200  | 0.1607 | 1110840 | 561   | 4.58E-02               | 0.35 | MEX |
| 6   | 27886961  | 28519223  | 0.0940 | 632262  | 359   | 2.91E-02               | 0.6  | CEU |
| 6   | 27896921  | 28550085  | 0.1012 | 653164  | 369   | 3.54E-02               | 0.55 | TSI |
| 6   | 28630674  | 30338107  | 0.6657 | 1707433 | 1557  | 3.98E-02               | 0.05 | ASW |
| 6   | 29470272  | 30279806  | 0.5032 | 809534  | 1062  | 9.95E-03               | 0.2  | GIH |
| 6   | 29607395  | 30453097  | 0.5086 | 845702  | 1090  | 6.08E-03               | 0.1  | YRI |
| 6   | 29638607  | 31677499  | 0.8643 | 2038892 | 3467  | 2.00E-02               | 0.05 | CHS |
| 6   | 29657422  | 31428789  | 1.1987 | 1771367 | 2147  | 1.14E-02               | 0.05 | CHD |
| 6   | 29831140  | 30197407  | 0.3091 | 366267  | 471   | 4.48E-02               | 0.15 | LWK |
| 6   | 29835002  | 30440139  | 0.3774 | 605137  | 748   | 1.78E-02               | 0.25 | CEU |
| 6   | 29838902  | 30453850  | 0.3771 | 614948  | 771   | 4.33E-02               | 0.25 | JPT |
| 6   | 29942930  | 32040156  | 1.4243 | 2097226 | 2295  | 5.11E-03               | 0.05 | CHB |
| 6   | 30476436  | 31736712  | 1.0327 | 1260276 | 1437  | 3.96E-02               | 0.05 | TSI |
| 6   | 30553455  | 31452273  | 0.7122 | 898818  | 1035  | 1.58E-02               | 0.15 | GIH |
| 6   | 31094506  | 32481163  | 1.0265 | 1386657 | 1489  | 2.45E-02               | 0.1  | JPT |
| 6   | 31126427  | 31451583  | 0.3635 | 325156  | 478   | 1.96E-03               | 0.2  | ASW |
| 6   | 31317489  | 31543098  | 0.3235 | 225609  | 274   | 4.81E-02               | 0.2  | YRI |
| 6   | 31515983  | 32950669  | 0.9608 | 1434686 | 1458  | 1.16E-02               | 0.1  | CEU |
| 6   | 33073726  | 33758599  | 0.6617 | 684873  | 554   | 5.66E-04               | 0.2  | LWK |
| 6   | 33153478  | 33207188  | 0.0830 | 53710   | 113   | 4.28E-02               | 0.55 | YRI |
| 6   | 33245381  | 33961049  | 0.5521 | 715668  | 457   | 3.00E-02               | 0.1  | ASW |
| 6   | 33283553  | 33945294  | 0.4734 | 661741  | 412   | 1.86E-02               | 0.15 | YRI |
| 6   | 33434412  | 35693077  | 2.0223 | 2258665 | 1077  | 3.01E-02               | 0.05 | JPT |
| 6   | 34186441  | 36235447  | 1.0923 | 2049006 | 777   | 1.74E-02               | 0.15 | MEX |
| 6   | 34771576  | 35822582  | 0.3499 | 1051006 | 436   | 3.77E-02               | 0.15 | LWK |
| 6   | 48495088  | 49774340  | 0.4418 | 1279252 | 421   | 1.74E-02               | 0.35 | MEX |
| 6   | 69720601  | 70604664  | 0.4067 | 884063  | 372   | 2.99E-02               | 0.15 | LWK |
| 6   | 69850800  | 70124723  | 0.1102 | 273923  | 117   | 2.91E-02               | 0.8  | MAS |
| 6   | 73809079  | 73916332  | 0.2071 | 107253  | 55    | 3.41E-02               | 0.75 | GIH |
| 6   | 73861595  | 73916332  | 0.1773 | 54737   | 36    | 2.36E-02               | 0.85 | TSI |
| 6   | 73863130  | 73913789  | 0.0693 | 50659   | 33    | 4.01E-02               | 0.95 | CEU |
| 6   | 73863130  | 73916332  | 0.1866 | 53202   | 37    | 3.58E-02               | 0.8  | INS |
| 6   | 88762834  | 88878455  | 0.3961 | 115621  | 43    | 2.86E-02               | 0.75 | MAS |
| 6   | 103976702 | 104092929 | 0.2727 | 116227  | 53    | 3.71E-02               | 0.7  | INS |
| 6   | 105639472 | 105742097 | 0.1770 | 102625  | 75    | 2.59E-02               | 0.8  | MAS |
| 6   | 105645907 | 105737023 | 0.2270 | 91116   | 66    | 1.45E-02               | 0.85 | CHS |
| 6   | 105975823 | 106058765 | 0.2399 | 82942   | 33    | 1.94E-02               | 0.9  | CHS |
| 6   | 120403970 | 122054906 | 0.9244 | 1650936 | 619   | 2.52E-03               | 0.1  | ASW |
| 6   | 124039525 | 124190847 | 0.3182 | 151322  | 71    | 1.63E-02               | 0.7  | CEU |
| 6   | 124039525 | 124178889 | 0.2789 | 139364  | 63    | 2.67E-02               | 0.7  | TSI |
| 6   | 124100953 | 124140135 | 0.3298 | 39182   | 10    | 3.57E-02               | 0.9  | INS |
| 6   | 125756107 | 125832721 | 0.2435 | 76614   | 45    | 1.09E-02               | 0.9  | CHB |
| 6   | 125756107 | 125832721 | 0.2435 | 76614   | 45    | 3.95E-02               | 0.85 | CHD |
| 6   | 125756107 | 125832721 | 0.2244 | 76614   | 38    | 4.99E-02               | 0.85 | CHS |
| 6   | 125756107 | 125832721 | 0.2435 | 76614   | 45    | 2.44E-03               | 0.95 | JPT |
| 6   | 129217882 | 129567166 | 0.2457 | 349284  | 158   | 3.63E-02               | 0.7  | CHB |
| 6   | 129217882 | 129567166 | 0.2457 | 349284  | 158   | 3.94E-02               | 0.7  | JPT |
| 6   | 129221234 | 129575312 | 0.2597 | 354078  | 160   | 3.31E-02               | 0.55 | MEX |
| 6   | 129241476 | 129455026 | 0.1159 | 213550  | 115   | 3.05E-02               | 0.8  | MAS |



| chr | start     | end       | gened  | pyhsd   | n.snp | adjusted haploPS score | f    | pop |
|-----|-----------|-----------|--------|---------|-------|------------------------|------|-----|
| 6   | 132632478 | 134596031 | 3.0453 | 1963553 | 1049  | 2.27E-03               | 0.05 | LWK |
| 6   | 158563514 | 158892410 | 0.1922 | 328896  | 159   | 2.48E-02               | 0.4  | YRI |
| 7   | 4024062   | 4115363   | 0.1984 | 91301   | 57    | 4.40E-02               | 0.85 | CHD |
| 7   | 19038306  | 19094932  | 0.2143 | 56626   | 17    | 1.43E-02               | 0.95 | CEU |
| 7   | 19038306  | 19094932  | 0.2143 | 56626   | 17    | 3.96E-02               | 0.9  | GIH |
| 7   | 19038306  | 19094932  | 0.2143 | 56626   | 17    | 2.20E-02               | 0.9  | MEX |
| 7   | 19038306  | 19094932  | 0.2143 | 56626   | 17    | 4.36E-02               | 0.9  | TSI |
| 7   | 20333053  | 20453361  | 0.3433 | 120308  | 87    | 1.56E-02               | 0.4  | LWK |
| 7   | 20357908  | 20453361  | 0.2574 | 95453   | 72    | 3.25E-02               | 0.45 | MKK |
| 7   | 29887937  | 30143369  | 0.2847 | 255432  | 120   | 1.68E-02               | 0.7  | MAS |
| 7   | 30213539  | 30444581  | 0.2205 | 231042  | 102   | 2.77E-02               | 0.8  | CHB |
| 7   | 30213539  | 30373970  | 0.1042 | 160431  | 61    | 3.93E-02               | 0.85 | GIH |
| 7   | 30213539  | 30444581  | 0.2205 | 231042  | 102   | 3.34E-02               | 0.8  | JPT |
| 7   | 30213539  | 30442258  | 0.4223 | 228719  | 93    | 1.16E-02               | 0.7  | MAS |
| 7   | 41352948  | 42057053  | 1.1096 | 704105  | 368   | 2.33E-02               | 0.1  | LWK |
| 7   | 47119915  | 47885203  | 1.4054 | 765288  | 473   | 4.73E-03               | 0.1  | LWK |
| 7   | 71951080  | 72434199  | 0.1261 | 483119  | 30    | 1.58E-02               | 0.7  | MKK |
| 7   | 72395959  | 72494205  | 0.2864 | 98246   | 19    | 6.86E-03               | 0.7  | ASW |
| 7   | 72400365  | 72494366  | 0.2863 | 94001   | 15    | 2.03E-02               | 0.75 | YRI |
| 7   | 73714429  | 74897267  | 0.6344 | 1182838 | 26    | 3.17E-02               | 0.85 | CHB |
| 7   | 73714429  | 74896316  | 0.6338 | 1181887 | 25    | 1.64E-02               | 0.9  | JPT |
| 7   | 74030155  | 74897267  | 0.5258 | 867112  | 7     | 3.80E-02               | 0.95 | TSI |
| 7   | 80118802  | 80681876  | 1.3316 | 563074  | 280   | 1.30E-02               | 0.15 | YRI |
| 7   | 87059734  | 87423695  | 0.1986 | 363961  | 140   | 3.59E-02               | 0.6  | INS |
| 7   | 91894910  | 92086012  | 0.2708 | 191102  | 61    | 3.56E-02               | 0.7  | GIH |
| 7   | 98536310  | 99260475  | 0.4679 | 724165  | 228   | 4.02E-02               | 0.4  | MEX |
| 7   | 98696103  | 99267779  | 0.1656 | 571676  | 166   | 1.19E-02               | 0.7  | CEU |
| 7   | 98715203  | 99203387  | 0.0843 | 488184  | 145   | 2.43E-02               | 0.75 | TSI |
| 7   | 111910801 | 112533491 | 0.6930 | 622690  | 210   | 2.21E-02               | 0.5  | CHB |
| 7   | 111917245 | 112625852 | 0.6449 | 708607  | 240   | 3.80E-02               | 0.45 | CHD |
| 7   | 111943958 | 112413077 | 0.2386 | 469119  | 144   | 9.31E-03               | 0.8  | JPT |
| 7   | 112424175 | 112640609 | 0.3569 | 216434  | 79    | 3.10E-02               | 0.75 | JPT |
| 7   | 117344604 | 120416717 | 1.0057 | 3072113 | 824   | 4.92E-02               | 0.05 | MKK |
| 7   | 118278239 | 119103185 | 0.1700 | 824946  | 174   | 1.51E-02               | 0.65 | GIH |
| 7   | 118795593 | 118867387 | 0.1904 | 71794   | 18    | 2.74E-02               | 0.9  | INS |
| 7   | 119383405 | 119783126 | 0.1137 | 399721  | 79    | 3.80E-02               | 0.8  | GIH |
| 7   | 119679297 | 120053694 | 0.1336 | 374397  | 121   | 2.68E-02               | 0.7  | INS |
| 7   | 119791151 | 119982844 | 0.0710 | 191693  | 67    | 2.85E-02               | 0.9  | GIH |
| 7   | 126630537 | 127617350 | 0.3734 | 986813  | 566   | 2.16E-02               | 0.35 | MAS |
| 7   | 126647066 | 127610096 | 0.3863 | 963030  | 503   | 2.06E-02               | 0.4  | CHB |
| 7   | 126716840 | 127589178 | 0.2746 | 872338  | 477   | 2.23E-02               | 0.45 | CHS |
| 7   | 126720180 | 127631331 | 0.3210 | 911151  | 442   | 2.42E-02               | 0.45 | CHD |
| 7   | 126735606 | 127628256 | 0.2695 | 892650  | 432   | 1.52E-02               | 0.5  | JPT |
| 7   | 131171022 | 131264503 | 0.1159 | 93481   | 71    | 1.71E-02               | 0.95 | CHB |
| 7   | 131171022 | 131264503 | 0.1159 | 93481   | 71    | 1.43E-02               | 0.95 | JPT |
| 7   | 131173326 | 131264503 | 0.0965 | 91177   | 70    | 2.67E-02               | 0.95 | CHD |
| 7   | 135427316 | 135522487 | 0.3112 | 95171   | 65    | 3.08E-02               | 0.8  | CHB |
| 7   | 135427316 | 135522487 | 0.3112 | 95171   | 65    | 3.86E-02               | 0.8  | JPT |
| 7   | 135435920 | 135522487 | 0.2623 | 86567   | 64    | 4.64E-02               | 0.8  | CHD |

| chr | start     | end       | gened  | pyhsd   | n.snp | adjusted haploPS score | f    | pop |
|-----|-----------|-----------|--------|---------|-------|------------------------|------|-----|
| 7   | 135479126 | 135518370 | 0.1699 | 39244   | 44    | 1.89E-02               | 0.9  | CHS |
| 7   | 136091036 | 136183912 | 0.1962 | 92876   | 25    | 2.96E-02               | 0.9  | MAS |
| 7   | 136791784 | 136978915 | 0.1869 | 187131  | 83    | 6.30E-03               | 0.8  | CEU |
| 7   | 136834047 | 136978915 | 0.1632 | 144868  | 69    | 6.71E-03               | 0.85 | TSI |
| 7   | 136867054 | 136981473 | 0.1361 | 114419  | 57    | 1.28E-02               | 0.9  | MAS |
| 7   | 142255340 | 142399886 | 0.2056 | 144546  | 105   | 4.78E-03               | 0.9  | CHB |
| 7   | 142255340 | 142357842 | 0.1774 | 102502  | 77    | 2.40E-02               | 0.8  | MAS |
| 7   | 142267304 | 142335539 | 0.0611 | 68235   | 61    | 3.02E-02               | 0.85 | MEX |
| 7   | 142338604 | 142547945 | 0.1876 | 209341  | 84    | 2.16E-02               | 0.7  | MEX |
| 7   | 142347184 | 142547945 | 0.1823 | 200761  | 79    | 5.54E-03               | 0.9  | CHD |
| 7   | 142350718 | 142547754 | 0.1440 | 197036  | 78    | 3.10E-02               | 0.75 | INS |
| 7   | 142361476 | 142549290 | 0.1488 | 187814  | 68    | 3.32E-03               | 0.95 | CHS |
| 7   | 142361476 | 142549290 | 0.1663 | 187814  | 69    | 2.95E-03               | 0.9  | MAS |
| 7   | 142363600 | 142549290 | 0.1806 | 185690  | 60    | 4.79E-02               | 0.75 | GIH |
| 7   | 142363600 | 142549290 | 0.1806 | 185690  | 60    | 4.30E-03               | 0.95 | JPT |
| 7   | 143852325 | 143906857 | 0.3313 | 54532   | 18    | 2.37E-02               | 0.95 | CHB |
| 7   | 143852325 | 143908526 | 0.3750 | 56201   | 19    | 1.68E-02               | 0.95 | CHD |
| 7   | 143852325 | 143908526 | 0.3750 | 56201   | 19    | 1.67E-02               | 0.95 | JPT |
| 7   | 143853833 | 143908526 | 0.7545 | 54693   | 17    | 3.88E-02               | 0.8  | CHS |
| 7   | 143858588 | 143906857 | 0.2740 | 48269   | 15    | 2.99E-02               | 0.9  | GIH |
| 7   | 145991850 | 146059148 | 0.1622 | 67298   | 45    | 3.46E-02               | 0.8  | INS |
| 8   | 4468075   | 4734293   | 0.5874 | 266218  | 355   | 4.87E-02               | 0.3  | MEX |
| 8   | 9423238   | 9726911   | 0.1371 | 303673  | 125   | 3.36E-02               | 0.45 | ASW |
| 8   | 10870500  | 11128546  | 0.5528 | 258046  | 154   | 1.57E-02               | 0.5  | MEX |
| 8   | 10953933  | 11128546  | 0.2942 | 174613  | 105   | 1.30E-02               | 0.8  | CHB |
| 8   | 10955803  | 11129662  | 0.2938 | 173859  | 105   | 1.46E-02               | 0.8  | JPT |
| 8   | 10961779  | 11109959  | 0.1275 | 148180  | 88    | 2.02E-02               | 0.9  | CHD |
| 8   | 10961779  | 11129662  | 0.2234 | 167883  | 116   | 1.46E-02               | 0.8  | CHS |
| 8   | 11434265  | 11507031  | 0.5034 | 72766   | 52    | 1.34E-02               | 0.8  | CHS |
| 8   | 11434265  | 11507982  | 0.3442 | 73717   | 56    | 4.14E-02               | 0.8  | JPT |
| 8   | 11928738  | 12595527  | 2.7375 | 666789  | 6     | 1.84E-02               | 0.9  | CHB |
| 8   | 11928738  | 12583900  | 2.7228 | 655162  | 5     | 1.54E-02               | 0.95 | CHD |
| 8   | 11928738  | 12575194  | 2.7190 | 646456  | 4     | 3.30E-02               | 0.95 | JPT |
| 8   | 16233288  | 16441711  | 0.2733 | 208423  | 79    | 2.69E-02               | 0.65 | MEX |
| 8   | 16256455  | 16409289  | 0.2029 | 152834  | 59    | 4.74E-02               | 0.75 | CEU |
| 8   | 42262896  | 42443137  | 0.0696 | 180241  | 64    | 1.62E-02               | 0.85 | MEX |
| 8   | 50427166  | 51138284  | 0.1367 | 711118  | 258   | 3.23E-02               | 0.55 | MEX |
| 8   | 50428283  | 51320466  | 0.1552 | 892183  | 321   | 6.62E-03               | 0.7  | JPT |
| 8   | 50442166  | 51233532  | 0.1477 | 791366  | 287   | 5.65E-03               | 0.75 | CHB |
| 8   | 50443270  | 50816259  | 0.0731 | 372989  | 116   | 3.54E-02               | 0.8  | TSI |
| 8   | 50444713  | 51142873  | 0.1258 | 698160  | 257   | 2.53E-02               | 0.7  | CHD |
| 8   | 50444713  | 51109255  | 0.0828 | 664542  | 261   | 2.76E-02               | 0.75 | CHS |
| 8   | 50444713  | 51502012  | 0.1766 | 1057299 | 429   | 2.27E-02               | 0.5  | MAS |
| 8   | 58170835  | 58371459  | 0.2290 | 200624  | 79    | 2.60E-02               | 0.7  | GIH |
| 8   | 58211816  | 58393502  | 0.2285 | 181686  | 76    | 4.99E-02               | 0.65 | MEX |
| 8   | 59428857  | 62040177  | 2.3690 | 2611320 | 1162  | 5.16E-03               | 0.05 | GIH |
| 8   | 66841775  | 67126543  | 0.2235 | 284768  | 99    | 5.57E-03               | 0.8  | MAS |
| 8   | 82214785  | 82315105  | 0.1874 | 100320  | 30    | 9.19E-03               | 0.95 | CHS |
| 8   | 82218220  | 82315105  | 0.1452 | 96885   | 29    | 7.07E-03               | 0.95 | MAS |

| chr | start     | end       | gened  | pyhsd   | n.snp | adjusted haploPS score | f    | pop |
|-----|-----------|-----------|--------|---------|-------|------------------------|------|-----|
| 8   | 82333477  | 82390493  | 0.2847 | 57016   | 19    | 2.57E-02               | 0.95 | CHB |
| 8   | 82333477  | 82390493  | 0.2847 | 57016   | 19    | 2.63E-02               | 0.95 | CHD |
| 8   | 82333477  | 82390493  | 0.1536 | 57016   | 24    | 4.35E-02               | 0.95 | CHS |
| 8   | 82333477  | 82390493  | 0.2847 | 57016   | 19    | 2.45E-02               | 0.95 | JPT |
| 8   | 94330163  | 96316049  | 2.0191 | 1985886 | 889   | 1.46E-02               | 0.05 | GIH |
| 8   | 99569926  | 101062323 | 0.1250 | 1492397 | 484   | 1.89E-02               | 0.45 | INS |
| 8   | 99934477  | 100895039 | 0.0503 | 960562  | 335   | 3.39E-02               | 0.6  | GIH |
| 8   | 100502644 | 100895039 | 0.0324 | 392395  | 177   | 4.89E-02               | 0.55 | YRI |
| 8   | 111526351 | 111757796 | 0.3008 | 231445  | 77    | 1.89E-02               | 0.8  | CHS |
| 8   | 129601852 | 129661717 | 0.2032 | 59865   | 35    | 7.42E-03               | 0.95 | JPT |
| 8   | 129603855 | 129641731 | 0.1779 | 37876   | 26    | 3.44E-02               | 0.95 | CHB |
| 8   | 129603855 | 129666059 | 0.2574 | 62204   | 34    | 2.02E-02               | 0.9  | CHD |
| 8   | 139005674 | 139158337 | 0.1879 | 152663  | 87    | 1.95E-02               | 0.85 | CHB |
| 8   | 139005674 | 139158337 | 0.1879 | 152663  | 87    | 1.70E-02               | 0.85 | JPT |
| 8   | 139044879 | 139156857 | 0.1500 | 111978  | 77    | 3.32E-02               | 0.85 | CHS |
| 8   | 139044879 | 139106414 | 0.1129 | 61535   | 31    | 1.42E-02               | 0.95 | MAS |
| 8   | 139045840 | 139156386 | 0.1553 | 110546  | 68    | 6.13E-03               | 0.95 | CHD |
| 9   | 13800014  | 13869572  | 0.1859 | 69558   | 82    | 4.49E-02               | 0.8  | CHS |
| 9   | 13819452  | 13907453  | 0.2203 | 88001   | 84    | 3.79E-02               | 0.8  | CHB |
| 9   | 13819452  | 13892765  | 0.1910 | 73313   | 71    | 3.46E-02               | 0.85 | JPT |
| 9   | 13898391  | 13964008  | 0.1854 | 65617   | 58    | 1.62E-02               | 0.85 | MAS |
| 9   | 13909776  | 13964008  | 0.2190 | 54232   | 46    | 3.41E-02               | 0.85 | CHS |
| 9   | 17848979  | 17905817  | 0.2081 | 56838   | 45    | 4.06E-02               | 0.85 | CHS |
| 9   | 19523872  | 19555588  | 0.2460 | 31716   | 15    | 3.56E-03               | 0.95 | INS |
| 9   | 30064416  | 30970218  | 0.3722 | 905802  | 333   | 5.00E-02               | 0.15 | ASW |
| 9   | 73585441  | 73722438  | 0.1704 | 136997  | 26    | 3.92E-02               | 0.85 | MEX |
| 9   | 90080934  | 90294520  | 0.2663 | 213586  | 61    | 3.49E-02               | 0.7  | TSI |
| 9   | 90830146  | 90867761  | 0.2346 | 37615   | 27    | 1.37E-02               | 0.95 | CHB |
| 9   | 90830146  | 90867761  | 0.2346 | 37615   | 27    | 1.40E-02               | 0.95 | CHD |
| 9   | 90830146  | 90869638  | 0.2688 | 39492   | 28    | 8.16E-03               | 0.95 | JPT |
| 9   | 90831383  | 90956526  | 0.1333 | 125143  | 59    | 3.89E-02               | 0.9  | CHS |
| 9   | 90831383  | 90867761  | 0.1132 | 36378   | 30    | 1.75E-02               | 0.95 | MAS |
| 9   | 91500477  | 91584522  | 0.2870 | 84045   | 37    | 2.67E-03               | 0.9  | MAS |
| 9   | 91515255  | 91586235  | 0.2385 | 70980   | 17    | 3.16E-02               | 0.95 | CHS |
| 9   | 99607955  | 99791583  | 0.1110 | 183628  | 78    | 4.10E-02               | 0.55 | MKK |
| 9   | 99607955  | 99780936  | 0.1107 | 172981  | 73    | 3.10E-02               | 0.6  | YRI |
| 9   | 99692403  | 99779709  | 0.0746 | 87306   | 36    | 4.24E-02               | 0.7  | LWK |
| 9   | 106985636 | 107247018 | 0.3501 | 261382  | 116   | 8.18E-03               | 0.8  | CHB |
| 9   | 106985636 | 107247018 | 0.3501 | 261382  | 116   | 2.48E-03               | 0.85 | JPT |
| 9   | 106985636 | 107247018 | 0.3501 | 261382  | 116   | 3.32E-02               | 0.55 | MEX |
| 9   | 106989995 | 107247018 | 0.3337 | 257023  | 120   | 3.93E-02               | 0.55 | INS |
| 9   | 107001111 | 107247018 | 0.2942 | 245907  | 110   | 9.73E-03               | 0.8  | CHD |
| 9   | 107021818 | 107237687 | 0.2305 | 215869  | 94    | 1.23E-02               | 0.7  | TSI |
| 9   | 107113735 | 107237687 | 0.2236 | 123952  | 41    | 4.51E-02               | 0.8  | MAS |
| 9   | 107200685 | 107245083 | 0.5489 | 44398   | 19    | 5.09E-03               | 0.95 | CHS |
| 9   | 110170570 | 110412429 | 0.3924 | 241859  | 162   | 4.70E-02               | 0.6  | CHB |
| 9   | 110181693 | 110410567 | 0.2787 | 228874  | 181   | 3.67E-02               | 0.65 | CHS |
| 9   | 114400326 | 114441827 | 0.2036 | 41501   | 11    | 4.79E-02               | 0.8  | LWK |
| 9   | 119523830 | 119576672 | 0.2747 | 52842   | 56    | 7.07E-03               | 0.85 | MAS |

| chr | start     | end       | gened  | pyhsd   | n.snp | adjusted haploPS score | f    | pop |
|-----|-----------|-----------|--------|---------|-------|------------------------|------|-----|
| 9   | 121665047 | 121691605 | 0.2726 | 26558   | 13    | 4.94E-02               | 0.9  | GIH |
| 9   | 121665047 | 121691719 | 0.2827 | 26672   | 15    | 8.74E-03               | 0.95 | MAS |
| 9   | 124145611 | 124199342 | 0.2183 | 53731   | 78    | 4.52E-02               | 0.8  | CHB |
| 9   | 124149760 | 124199342 | 0.1836 | 49582   | 77    | 2.87E-02               | 0.85 | JPT |
| 9   | 124174237 | 124205046 | 0.1941 | 30809   | 67    | 2.53E-02               | 0.75 | GIH |
| 9   | 124525569 | 124594587 | 0.2106 | 69018   | 22    | 2.62E-02               | 0.9  | CEU |
| 9   | 124525569 | 124594587 | 0.2106 | 69018   | 22    | 2.10E-02               | 0.9  | TSI |
| 9   | 125483780 | 125753232 | 0.1163 | 269452  | 110   | 3.78E-02               | 0.8  | MAS |
| 9   | 127818983 | 129529564 | 2.0208 | 1710581 | 815   | 2.00E-02               | 0.05 | GIH |
| 9   | 130420046 | 130529272 | 0.1884 | 109226  | 32    | 3.47E-02               | 0.85 | CEU |
| 9   | 139557213 | 139853982 | 0.1990 | 296769  | 117   | 2.97E-02               | 0.8  | JPT |
| 10  | 2983411   | 3058270   | 0.2425 | 74859   | 59    | 7.82E-03               | 0.9  | CHB |
| 10  | 2983411   | 3058270   | 0.2425 | 74859   | 59    | 2.64E-02               | 0.85 | CHD |
| 10  | 2983411   | 3059355   | 0.2815 | 75944   | 63    | 1.76E-02               | 0.85 | JPT |
| 10  | 2983411   | 3058270   | 0.2161 | 74859   | 56    | 3.35E-02               | 0.8  | MAS |
| 10  | 2983411   | 3058270   | 0.2425 | 74859   | 59    | 1.91E-02               | 0.75 | TSI |
| 10  | 2983482   | 3058270   | 0.2422 | 74788   | 58    | 8.80E-03               | 0.8  | CEU |
| 10  | 2983482   | 3058486   | 0.2495 | 75004   | 59    | 3.51E-02               | 0.7  | MEX |
| 10  | 5923951   | 6027850   | 0.3861 | 103899  | 97    | 3.93E-02               | 0.55 | MEX |
| 10  | 7467074   | 7505211   | 0.2588 | 38137   | 15    | 1.15E-02               | 0.95 | MAS |
| 10  | 22715863  | 22830890  | 0.1566 | 115027  | 52    | 3.31E-02               | 0.85 | MAS |
| 10  | 22719183  | 22830890  | 0.2774 | 111707  | 56    | 2.50E-02               | 0.85 | CHB |
| 10  | 22719183  | 22830890  | 0.2774 | 111707  | 56    | 2.03E-02               | 0.85 | CHD |
| 10  | 22719183  | 22787162  | 0.0272 | 67979   | 37    | 4.59E-02               | 0.95 | GIH |
| 10  | 22719183  | 22830890  | 0.2774 | 111707  | 56    | 2.56E-02               | 0.85 | JPT |
| 10  | 22719183  | 22830890  | 0.2774 | 111707  | 56    | 8.92E-03               | 0.75 | MEX |
| 10  | 22719183  | 22830890  | 0.2774 | 111707  | 56    | 5.70E-03               | 0.8  | TSI |
| 10  | 22763535  | 22818373  | 0.2241 | 54838   | 33    | 1.74E-02               | 0.85 | CEU |
| 10  | 22899536  | 23122833  | 0.1766 | 223297  | 133   | 4.06E-02               | 0.7  | MAS |
| 10  | 24368938  | 24435153  | 0.1699 | 66215   | 20    | 4.86E-02               | 0.95 | CHS |
| 10  | 37874382  | 38408617  | 0.0534 | 534235  | 179   | 3.48E-02               | 0.5  | YRI |
| 10  | 45535772  | 45928700  | 2.1869 | 392928  | 5     | 3.73E-02               | 0.85 | INS |
| 10  | 55537663  | 55873747  | 0.1655 | 336084  | 236   | 1.98E-02               | 0.7  | CHS |
| 10  | 55540301  | 55878340  | 0.3003 | 338039  | 205   | 1.94E-02               | 0.65 | CHB |
| 10  | 55576118  | 55878340  | 0.2766 | 302222  | 180   | 1.51E-02               | 0.7  | CHD |
| 10  | 55645372  | 55877503  | 0.2065 | 232131  | 116   | 2.94E-02               | 0.8  | JPT |
| 10  | 58454974  | 58683042  | 0.3289 | 228068  | 106   | 8.41E-03               | 0.8  | CHS |
| 10  | 59100707  | 59382097  | 0.2436 | 281390  | 117   | 3.38E-02               | 0.6  | MEX |
| 10  | 59239732  | 59493843  | 0.3694 | 254111  | 170   | 4.72E-02               | 0.6  | CHS |
| 10  | 59241443  | 59475057  | 0.2568 | 233614  | 139   | 4.66E-02               | 0.7  | CHB |
| 10  | 59244741  | 59493843  | 0.2560 | 249102  | 144   | 4.30E-02               | 0.7  | CHD |
| 10  | 59244741  | 59495589  | 0.2280 | 250848  | 169   | 3.66E-02               | 0.65 | MAS |
| 10  | 65461949  | 65683554  | 0.2705 | 221605  | 96    | 2.99E-02               | 0.65 | CEU |
| 10  | 65461949  | 65892784  | 0.3927 | 430835  | 132   | 3.73E-02               | 0.6  | MAS |
| 10  | 65461949  | 65701100  | 0.2733 | 239151  | 108   | 2.95E-02               | 0.6  | MEX |
| 10  | 65463876  | 65701100  | 0.2000 | 237224  | 107   | 3.61E-02               | 0.65 | TSI |
| 10  | 68760010  | 69578163  | 0.4240 | 818153  | 263   | 3.46E-02               | 0.4  | TSI |
| 10  | 74416452  | 75076147  | 0.1212 | 659695  | 178   | 5.58E-03               | 0.8  | TSI |
| 10  | 74427256  | 74672001  | 0.0153 | 244745  | 74    | 4.67E-02               | 0.85 | MEX |

| chr | start     | end       | gened  | pyhsd   | n.snp | adjusted haploPS score | f    | pop |
|-----|-----------|-----------|--------|---------|-------|------------------------|------|-----|
| 10  | 74806089  | 75076147  | 0.0909 | 270058  | 69    | 3.59E-02               | 0.85 | CEU |
| 10  | 78672427  | 79205306  | 1.0243 | 532879  | 352   | 3.39E-02               | 0.1  | LWK |
| 10  | 83978741  | 84315167  | 0.2474 | 336426  | 158   | 3.17E-02               | 0.55 | GIH |
| 10  | 86833539  | 87064857  | 0.1178 | 231318  | 130   | 3.92E-02               | 0.7  | GIH |
| 10  | 86883236  | 87277788  | 0.4033 | 394552  | 215   | 4.92E-02               | 0.55 | JPT |
| 10  | 92947202  | 95385717  | 2.1427 | 2438515 | 1056  | 3.21E-02               | 0.05 | JPT |
| 10  | 93078168  | 93277560  | 0.0819 | 199392  | 55    | 3.73E-02               | 0.9  | GIH |
| 10  | 94492224  | 94858444  | 0.2224 | 366220  | 216   | 3.71E-02               | 0.65 | CHB |
| 10  | 94492718  | 94856668  | 0.2871 | 363950  | 219   | 3.35E-02               | 0.6  | CHS |
| 10  | 94492718  | 94832203  | 0.2054 | 339485  | 203   | 1.48E-02               | 0.65 | MAS |
| 10  | 94836083  | 95141612  | 0.4026 | 305529  | 196   | 4.59E-02               | 0.55 | CHD |
| 10  | 101788336 | 102352105 | 0.4446 | 563769  | 254   | 3.16E-02               | 0.2  | YRI |
| 10  | 102454123 | 102574587 | 0.2027 | 120464  | 60    | 4.62E-02               | 0.85 | CHB |
| 10  | 104573922 | 104793052 | 0.0275 | 219130  | 79    | 3.91E-02               | 0.65 | LWK |
| 10  | 106546794 | 107547879 | 0.3886 | 1001085 | 534   | 1.61E-02               | 0.4  | CHB |
| 10  | 107026591 | 107474816 | 0.2243 | 448225  | 198   | 2.36E-02               | 0.7  | CHD |
| 10  | 107163031 | 107413259 | 0.1791 | 250228  | 114   | 2.73E-02               | 0.8  | CHS |
| 10  | 118103897 | 118208925 | 0.1264 | 105028  | 59    | 2.53E-02               | 0.85 | GIH |
| 10  | 118188266 | 118341404 | 0.1643 | 153138  | 69    | 2.18E-02               | 0.8  | CEU |
| 10  | 118188266 | 118340939 | 0.1445 | 152673  | 67    | 3.68E-02               | 0.8  | TSI |
| 10  | 118221091 | 118340939 | 0.1443 | 119848  | 55    | 4.34E-02               | 0.8  | INS |
| 10  | 121867472 | 121881512 | 0.1570 | 14040   | 11    | 4.83E-02               | 0.95 | MEX |
| 11  | 5188141   | 5598602   | 0.9991 | 410461  | 485   | 2.10E-02               | 0.1  | YRI |
| 11  | 23668389  | 23735797  | 0.1270 | 67408   | 35    | 4.52E-02               | 0.9  | MAS |
| 11  | 23679619  | 23735797  | 0.1844 | 56178   | 27    | 1.35E-02               | 0.95 | CHS |
| 11  | 25062167  | 25185866  | 0.2552 | 123699  | 64    | 4.82E-02               | 0.8  | CHD |
| 11  | 25062726  | 25229215  | 0.3719 | 166489  | 81    | 2.74E-02               | 0.75 | CHB |
| 11  | 25064349  | 25232451  | 0.4468 | 168102  | 81    | 3.66E-02               | 0.7  | JPT |
| 11  | 25119121  | 25163804  | 0.1806 | 44683   | 36    | 2.84E-02               | 0.9  | CHS |
| 11  | 25143560  | 25353119  | 0.2100 | 209559  | 115   | 4.52E-02               | 0.7  | MAS |
| 11  | 25196163  | 25598001  | 0.2994 | 401838  | 170   | 1.76E-02               | 0.7  | CHD |
| 11  | 25226911  | 25586941  | 0.2250 | 360030  | 170   | 1.05E-02               | 0.75 | CHS |
| 11  | 33650124  | 35010976  | 2.8184 | 1360852 | 937   | 1.36E-02               | 0.05 | LWK |
| 11  | 37668746  | 38202461  | 0.2831 | 533715  | 171   | 1.86E-02               | 0.7  | CHD |
| 11  | 37668746  | 38180677  | 0.2637 | 511931  | 167   | 2.43E-02               | 0.7  | JPT |
| 11  | 37793512  | 38135306  | 0.2270 | 341794  | 122   | 1.76E-02               | 0.8  | CHB |
| 11  | 37911272  | 37995486  | 0.1629 | 84214   | 27    | 3.85E-02               | 0.9  | MAS |
| 11  | 39626026  | 39946041  | 0.2145 | 320015  | 162   | 1.64E-02               | 0.6  | MEX |
| 11  | 41561200  | 41636767  | 0.2393 | 75567   | 33    | 3.55E-02               | 0.85 | MAS |
| 11  | 60635491  | 61027771  | 0.1312 | 392280  | 119   | 1.27E-02               | 0.9  | CHD |
| 11  | 60635491  | 61027771  | 0.0833 | 392280  | 140   | 3.00E-02               | 0.9  | CHS |
| 11  | 60637432  | 61028885  | 0.1312 | 391453  | 117   | 1.87E-02               | 0.9  | CHB |
| 11  | 60643489  | 61027771  | 0.1302 | 384282  | 115   | 3.21E-03               | 0.95 | JPT |
| 11  | 60772098  | 61136437  | 0.2566 | 364339  | 128   | 2.63E-02               | 0.6  | TSI |
| 11  | 60775218  | 61006342  | 0.0670 | 231124  | 78    | 3.40E-02               | 0.9  | MAS |
| 11  | 64095162  | 64348255  | 0.2687 | 253093  | 90    | 3.41E-02               | 0.65 | CEU |
| 11  | 64095162  | 64354588  | 0.2709 | 259426  | 92    | 1.94E-02               | 0.65 | TSI |
| 11  | 64896352  | 67806752  | 1.4200 | 2910400 | 808   | 5.87E-03               | 0.15 | MEX |
| 11  | 66594721  | 66948025  | 0.1096 | 353304  | 88    | 2.89E-02               | 0.8  | GIH |

| chr | start     | end       | gened  | pyhsd   | n.snp | adjusted haploPS score | f    | pop |
|-----|-----------|-----------|--------|---------|-------|------------------------|------|-----|
| 11  | 66594721  | 66949131  | 0.2014 | 354410  | 113   | 8.22E-03               | 0.7  | INS |
| 11  | 67834242  | 68186263  | 0.3458 | 352021  | 141   | 4.43E-02               | 0.5  | INS |
| 11  | 77584034  | 78035685  | 0.3477 | 451651  | 154   | 1.98E-02               | 0.55 | CEU |
| 11  | 87892236  | 90630763  | 1.3291 | 2738527 | 980   | 4.40E-02               | 0.05 | CEU |
| 11  | 91676379  | 91849773  | 0.1748 | 173394  | 80    | 1.76E-02               | 0.75 | GIH |
| 11  | 91681501  | 91851009  | 0.1710 | 169508  | 80    | 4.19E-03               | 0.8  | MEX |
| 11  | 110023638 | 110209636 | 0.1832 | 185998  | 110   | 4.38E-03               | 0.5  | LWK |
| 11  | 129450904 | 129530155 | 0.1366 | 79251   | 40    | 3.05E-02               | 0.85 | INS |
| 12  | 951166    | 1459724   | 0.2932 | 508558  | 171   | 1.62E-02               | 0.7  | JPT |
| 12  | 15629793  | 15997790  | 0.2343 | 367997  | 145   | 6.29E-03               | 0.65 | GIH |
| 12  | 20876496  | 21011482  | 0.1093 | 134986  | 110   | 1.89E-02               | 0.75 | INS |
| 12  | 21308563  | 21399445  | 0.0834 | 90882   | 140   | 1.60E-02               | 0.75 | MEX |
| 12  | 33401684  | 34649300  | 0.1170 | 1247616 | 373   | 4.55E-02               | 0.55 | MAS |
| 12  | 36252688  | 39010297  | 0.7117 | 2757609 | 859   | 1.57E-02               | 0.2  | MEX |
| 12  | 41159574  | 44136773  | 2.1492 | 2977199 | 1263  | 4.42E-03               | 0.05 | GIH |
| 12  | 42489168  | 43107122  | 0.3713 | 617954  | 218   | 4.26E-02               | 0.55 | CHB |
| 12  | 42491285  | 43188531  | 0.3866 | 697246  | 240   | 1.62E-02               | 0.6  | JPT |
| 12  | 42597744  | 44321443  | 1.3276 | 1723699 | 657   | 1.91E-02               | 0.15 | MEX |
| 12  | 42881817  | 42987551  | 0.1881 | 105734  | 44    | 4.33E-02               | 0.75 | INS |
| 12  | 47959425  | 48451957  | 0.3605 | 492532  | 162   | 1.20E-02               | 0.7  | CHS |
| 12  | 47964796  | 48470263  | 0.2768 | 505467  | 163   | 4.58E-03               | 0.8  | CHB |
| 12  | 47964796  | 48470263  | 0.2768 | 505467  | 163   | 2.65E-02               | 0.7  | CHD |
| 12  | 48009848  | 48453169  | 0.1556 | 443321  | 145   | 2.91E-02               | 0.8  | JPT |
| 12  | 53412716  | 53547320  | 1.0220 | 134604  | 38    | 4.80E-02               | 0.6  | MAS |
| 12  | 57508987  | 57599418  | 0.2151 | 90431   | 56    | 4.32E-02               | 0.75 | CEU |
| 12  | 57525875  | 57750720  | 0.2666 | 224845  | 119   | 1.02E-02               | 0.65 | TSI |
| 12  | 65809611  | 65863997  | 0.1337 | 54386   | 28    | 1.25E-02               | 0.95 | MAS |
| 12  | 74752497  | 75123705  | 1.6156 | 371208  | 51    | 1.23E-02               | 0.65 | MAS |
| 12  | 78272240  | 78648427  | 0.3308 | 376187  | 112   | 4.58E-02               | 0.55 | MEX |
| 12  | 78401205  | 78652724  | 0.1742 | 251519  | 69    | 2.11E-02               | 0.55 | YRI |
| 12  | 78638266  | 78934970  | 0.2562 | 296704  | 70    | 1.42E-02               | 0.75 | CEU |
| 12  | 81099873  | 81575401  | 0.4072 | 475528  | 123   | 2.18E-02               | 0.35 | YRI |
| 12  | 86870158  | 87428895  | 0.3787 | 558737  | 174   | 1.86E-02               | 0.65 | CHB |
| 12  | 86871331  | 87412346  | 0.2339 | 541015  | 187   | 1.68E-02               | 0.7  | CHS |
| 12  | 86871331  | 87414712  | 0.4687 | 543381  | 181   | 2.17E-02               | 0.55 | MAS |
| 12  | 86881127  | 87414712  | 0.2295 | 533585  | 170   | 3.69E-02               | 0.7  | CHD |
| 12  | 86937549  | 87688096  | 0.2249 | 750547  | 226   | 3.02E-02               | 0.5  | GIH |
| 12  | 87342610  | 87864243  | 0.1786 | 521633  | 158   | 2.73E-02               | 0.65 | CEU |
| 12  | 87342610  | 87674375  | 0.1011 | 331765  | 98    | 2.67E-02               | 0.8  | TSI |
| 12  | 87367958  | 87723114  | 0.1126 | 355156  | 103   | 1.01E-02               | 0.8  | MEX |
| 12  | 87539269  | 87723114  | 0.2901 | 183845  | 56    | 8.36E-04               | 0.85 | INS |
| 12  | 98739698  | 98995242  | 0.1066 | 255544  | 96    | 4.95E-02               | 0.9  | CHB |
| 12  | 98739698  | 99296032  | 0.2067 | 556334  | 174   | 4.52E-03               | 0.8  | CHD |
| 12  | 98739698  | 99146849  | 0.2023 | 407151  | 145   | 1.16E-02               | 0.8  | CHS |
| 12  | 98739698  | 99296032  | 0.2067 | 556334  | 174   | 7.76E-04               | 0.9  | JPT |
| 12  | 102087154 | 103950819 | 2.7210 | 1863665 | 1360  | 1.47E-03               | 0.05 | MKK |
| 12  | 105745057 | 107306065 | 1.8284 | 1561008 | 777   | 1.34E-02               | 0.05 | MKK |
| 12  | 107481335 | 109460058 | 1.4976 | 1978723 | 715   | 3.01E-02               | 0.05 | MKK |
| 12  | 108665528 | 111807450 | 1.2601 | 3141922 | 923   | 1.92E-02               | 0.1  | CHD |

| chr | start     | end       | gened  | pyhsd   | n.snp | adjusted haploPS score | f    | pop |
|-----|-----------|-----------|--------|---------|-------|------------------------|------|-----|
| 12  | 109807801 | 112446668 | 1.8748 | 2638867 | 934   | 2.05E-02               | 0.05 | CHB |
| 12  | 109841394 | 112515629 | 2.2217 | 2674235 | 955   | 3.97E-02               | 0.05 | JPT |
| 12  | 110032708 | 111072108 | 0.2302 | 1039400 | 343   | 3.62E-02               | 0.45 | TSI |
| 12  | 112328277 | 112375934 | 0.2266 | 47657   | 18    | 3.01E-02               | 0.95 | CHS |
| 12  | 112343834 | 112381135 | 0.1397 | 37301   | 14    | 4.02E-02               | 0.8  | ASW |
| 12  | 115670030 | 115828659 | 0.3157 | 158629  | 65    | 3.44E-02               | 0.65 | MEX |
| 12  | 121979264 | 122623065 | 0.4520 | 643801  | 153   | 8.71E-03               | 0.55 | GIH |
| 12  | 122405005 | 122828031 | 0.5376 | 423026  | 111   | 4.58E-02               | 0.5  | MEX |
| 12  | 122406541 | 122891313 | 0.5615 | 484772  | 133   | 7.65E-03               | 0.7  | CHD |
| 12  | 122406541 | 122842862 | 0.5426 | 436321  | 119   | 6.01E-04               | 0.9  | JPT |
| 12  | 122483546 | 122834234 | 0.1883 | 350688  | 154   | 1.12E-02               | 0.8  | CHS |
| 12  | 122499063 | 122577028 | 0.1396 | 77965   | 35    | 3.03E-02               | 0.9  | MAS |
| 12  | 122579359 | 122885054 | 0.1685 | 305695  | 126   | 3.60E-02               | 0.8  | CHB |
| 12  | 125520182 | 125630940 | 0.2537 | 110758  | 61    | 2.52E-02               | 0.85 | CHB |
| 12  | 125520182 | 125629813 | 0.2361 | 109631  | 59    | 4.14E-02               | 0.7  | MEX |
| 12  | 125522079 | 125632409 | 0.2811 | 110330  | 66    | 4.77E-02               | 0.8  | JPT |
| 12  | 127379351 | 127404601 | 0.2478 | 25250   | 19    | 4.28E-02               | 0.9  | MAS |
| 13  | 18847861  | 19386212  | 0.1806 | 538351  | 145   | 4.11E-02               | 0.75 | CHB |
| 13  | 18850959  | 19386212  | 0.1795 | 535253  | 143   | 2.20E-02               | 0.8  | JPT |
| 13  | 20705752  | 20753294  | 0.2217 | 47542   | 19    | 4.83E-02               | 0.95 | CHD |
| 13  | 20705752  | 20768166  | 0.2332 | 62414   | 28    | 1.21E-02               | 0.95 | JPT |
| 13  | 37775636  | 37860369  | 0.1528 | 84733   | 37    | 4.92E-02               | 0.85 | CEU |
| 13  | 37775636  | 37860369  | 0.1528 | 84733   | 37    | 4.35E-02               | 0.85 | TSI |
| 13  | 56453118  | 57152774  | 0.2888 | 699656  | 203   | 2.58E-02               | 0.25 | ASW |
| 13  | 56527759  | 57001072  | 0.0670 | 473313  | 127   | 4.08E-02               | 0.55 | YRI |
| 13  | 60292838  | 60493429  | 0.2399 | 200591  | 115   | 3.08E-02               | 0.7  | MAS |
| 13  | 60293427  | 60493599  | 0.1878 | 200172  | 105   | 4.87E-02               | 0.8  | JPT |
| 13  | 94479016  | 94587642  | 0.3346 | 108626  | 152   | 3.86E-02               | 0.5  | GIH |
| 13  | 102951017 | 103143536 | 0.1717 | 192519  | 120   | 3.80E-02               | 0.65 | MEX |
| 13  | 103648238 | 103714539 | 0.0983 | 66301   | 33    | 3.97E-02               | 0.9  | INS |
| 14  | 19284747  | 19453079  | 0.4512 | 168332  | 4     | 4.75E-02               | 0.95 | MKK |
| 14  | 23863737  | 24661742  | 1.1994 | 798005  | 543   | 4.81E-02               | 0.15 | MEX |
| 14  | 49021100  | 49473932  | 0.2799 | 452832  | 146   | 3.00E-02               | 0.7  | JPT |
| 14  | 59829480  | 60684493  | 0.2169 | 855013  | 229   | 1.63E-02               | 0.3  | LWK |
| 14  | 61014730  | 61131283  | 0.3460 | 116553  | 131   | 3.04E-02               | 0.55 | TSI |
| 14  | 62331615  | 63079242  | 0.7213 | 747627  | 356   | 4.11E-02               | 0.1  | ASW |
| 14  | 62757045  | 62837633  | 0.1854 | 80588   | 56    | 1.28E-02               | 0.8  | INS |
| 14  | 62821120  | 62954737  | 0.1987 | 133617  | 79    | 2.42E-02               | 0.7  | MEX |
| 14  | 62856527  | 62971047  | 0.1527 | 114520  | 56    | 4.45E-02               | 0.8  | TSI |
| 14  | 62858991  | 62967839  | 0.2031 | 108848  | 59    | 2.34E-02               | 0.75 | INS |
| 14  | 62962494  | 63137946  | 0.1824 | 175452  | 62    | 2.32E-02               | 0.75 | MEX |
| 14  | 65502497  | 66967075  | 0.3841 | 1464578 | 516   | 2.72E-02               | 0.3  | MEX |
| 14  | 65660573  | 66967453  | 0.2764 | 1306880 | 428   | 8.82E-04               | 0.55 | TSI |
| 14  | 65689881  | 66960075  | 0.2566 | 1270194 | 416   | 1.16E-03               | 0.55 | CEU |
| 14  | 65920022  | 66979795  | 0.2323 | 1059773 | 366   | 3.32E-02               | 0.25 | MKK |
| 14  | 76948436  | 77059691  | 0.1758 | 111255  | 59    | 3.66E-02               | 0.85 | CHS |
| 14  | 101638726 | 101737014 | 0.1136 | 98288   | 28    | 2.44E-02               | 0.95 | MAS |
| 14  | 105156965 | 105997070 | 1.4388 | 840105  | 6     | 2.17E-02               | 0.95 | CEU |
| 14  | 105156965 | 105692103 | 0.6963 | 535138  | 5     | 4.45E-02               | 0.95 | GIH |

| chr | start     | end       | gened  | pyhsd   | n.snp | adjusted haploPS score | f    | pop |
|-----|-----------|-----------|--------|---------|-------|------------------------|------|-----|
| 14  | 105156965 | 105692103 | 0.6963 | 535138  | 5     | 4.80E-02               | 0.95 | MEX |
| 14  | 105156965 | 105997070 | 1.4388 | 840105  | 6     | 3.81E-02               | 0.9  | TSI |
| 15  | 18453936  | 19322563  | 4.3229 | 868627  | 3     | 3.31E-02               | 0.9  | ASW |
| 15  | 18453936  | 19322563  | 4.3229 | 868627  | 3     | 4.67E-02               | 0.95 | CEU |
| 15  | 18453936  | 19322563  | 4.3229 | 868627  | 3     | 4.21E-02               | 0.95 | GIH |
| 15  | 18453936  | 19884656  | 5.1923 | 1430720 | 6     | 8.39E-03               | 0.8  | LWK |
| 15  | 18453936  | 19884656  | 5.1923 | 1430720 | 6     | 4.29E-02               | 0.75 | MEX |
| 15  | 18453936  | 19322563  | 4.3229 | 868627  | 3     | 4.16E-02               | 0.9  | MKK |
| 15  | 18453936  | 19322563  | 4.3229 | 868627  | 3     | 2.27E-02               | 0.95 | YRI |
| 15  | 26029250  | 26809337  | 1.8403 | 780087  | 67    | 1.84E-02               | 0.5  | TSI |
| 15  | 26039328  | 26809337  | 1.8380 | 770009  | 55    | 1.78E-02               | 0.5  | MEX |
| 15  | 26203954  | 26812158  | 1.8484 | 608204  | 6     | 3.79E-02               | 0.85 | CEU |
| 15  | 28081081  | 30713357  | 3.3900 | 2632276 | 691   | 4.77E-02               | 0.05 | MEX |
| 15  | 28141595  | 29110106  | 1.0052 | 968511  | 153   | 2.61E-03               | 0.6  | MAS |
| 15  | 28153539  | 29085644  | 2.0002 | 932105  | 137   | 2.28E-02               | 0.35 | INS |
| 15  | 28157206  | 28971039  | 0.6212 | 813833  | 40    | 3.32E-02               | 0.75 | CHB |
| 15  | 28157206  | 29038940  | 0.6352 | 881734  | 75    | 5.93E-03               | 0.8  | CHD |
| 15  | 28157206  | 28843762  | 1.3626 | 686556  | 37    | 4.28E-03               | 0.8  | CHS |
| 15  | 28157206  | 28971039  | 0.6212 | 813833  | 40    | 2.32E-02               | 0.8  | JPT |
| 15  | 34210025  | 34375288  | 0.2920 | 165263  | 67    | 3.29E-02               | 0.8  | CHB |
| 15  | 40233690  | 42886577  | 0.6753 | 2652887 | 796   | 2.13E-02               | 0.2  | JPT |
| 15  | 40676339  | 42280859  | 0.2464 | 1604520 | 459   | 3.03E-02               | 0.4  | CEU |
| 15  | 42925286  | 43171957  | 0.3957 | 246671  | 65    | 2.91E-03               | 0.75 | INS |
| 15  | 43928463  | 44076751  | 0.2095 | 148288  | 74    | 2.57E-02               | 0.85 | CHB |
| 15  | 43928463  | 44059275  | 0.1881 | 130812  | 67    | 8.11E-03               | 0.9  | CHD |
| 15  | 43928463  | 44059275  | 0.1881 | 130812  | 67    | 4.04E-02               | 0.85 | JPT |
| 15  | 43928463  | 44055830  | 0.2520 | 127367  | 69    | 5.46E-03               | 0.85 | MAS |
| 15  | 43961704  | 44085712  | 0.2796 | 124008  | 70    | 7.77E-03               | 0.85 | CHS |
| 15  | 46146961  | 46304763  | 0.1538 | 157802  | 44    | 6.53E-03               | 0.9  | CEU |
| 15  | 46146961  | 46305485  | 0.1568 | 158524  | 45    | 4.92E-02               | 0.8  | GIH |
| 15  | 46146961  | 46305485  | 0.1568 | 158524  | 45    | 1.78E-02               | 0.85 | TSI |
| 15  | 46464675  | 46732970  | 0.1794 | 268295  | 142   | 2.24E-02               | 0.65 | TSI |
| 15  | 46473467  | 46736370  | 0.3893 | 262903  | 144   | 1.26E-02               | 0.55 | INS |
| 15  | 46473602  | 46782678  | 0.2612 | 309076  | 159   | 2.51E-02               | 0.55 | GIH |
| 15  | 46479901  | 46782678  | 0.2137 | 302777  | 158   | 1.47E-02               | 0.65 | CEU |
| 15  | 61567335  | 61969444  | 0.1506 | 402109  | 148   | 1.62E-02               | 0.85 | CHB |
| 15  | 61567335  | 61971073  | 0.1518 | 403738  | 149   | 2.77E-02               | 0.8  | CHD |
| 15  | 61567335  | 61936702  | 0.1152 | 369367  | 125   | 2.44E-02               | 0.9  | JPT |
| 15  | 61567683  | 61928089  | 0.0826 | 360406  | 116   | 4.58E-02               | 0.9  | CHS |
| 15  | 61567683  | 62058713  | 0.1673 | 491030  | 196   | 3.48E-02               | 0.65 | MAS |
| 15  | 61971415  | 62134999  | 0.3453 | 163584  | 109   | 1.85E-02               | 0.75 | CHB |
| 15  | 61999328  | 62941185  | 0.1593 | 941857  | 315   | 3.33E-02               | 0.6  | CHS |
| 15  | 62122278  | 62938688  | 0.3338 | 816410  | 233   | 2.69E-03               | 0.7  | JPT |
| 15  | 62303982  | 62934451  | 0.1670 | 630469  | 166   | 1.16E-02               | 0.8  | CHD |
| 15  | 62424589  | 62904700  | 0.1571 | 480111  | 129   | 4.10E-02               | 0.8  | CHB |
| 15  | 67440101  | 67644716  | 0.0749 | 204615  | 85    | 4.00E-02               | 0.85 | TSI |
| 15  | 69835470  | 70570555  | 0.1513 | 735085  | 243   | 3.75E-03               | 0.6  | MEX |
| 15  | 69880666  | 70775924  | 0.1557 | 895258  | 304   | 3.01E-03               | 0.6  | INS |
| 15  | 69884515  | 70762555  | 0.1677 | 878040  | 260   | 4.25E-03               | 0.7  | CEU |



| chr | start    | end      | gened  | pyhsd   | n.snp | adjusted haploPS score | f    | pop |
|-----|----------|----------|--------|---------|-------|------------------------|------|-----|
| 15  | 69884515 | 70794003 | 0.1729 | 909488  | 268   | 1.42E-02               | 0.6  | GIH |
| 15  | 69916180 | 70794946 | 0.1446 | 878766  | 255   | 1.05E-02               | 0.65 | TSI |
| 15  | 80192696 | 81230621 | 0.8151 | 1037925 | 156   | 4.54E-02               | 0.2  | LWK |
| 15  | 80194449 | 81225246 | 0.8125 | 1030797 | 149   | 2.54E-02               | 0.25 | YRI |
| 15  | 88274514 | 88345490 | 0.1953 | 70976   | 18    | 4.27E-02               | 0.9  | GIH |
| 16  | 2062129  | 2167369  | 0.2584 | 105240  | 27    | 1.22E-02               | 0.9  | MAS |
| 16  | 2309072  | 2681813  | 0.5602 | 372741  | 80    | 4.46E-02               | 0.65 | CHS |
| 16  | 2309072  | 2370177  | 0.4459 | 61105   | 18    | 4.65E-02               | 0.85 | MAS |
| 16  | 2310040  | 2361830  | 0.2876 | 51790   | 21    | 3.15E-02               | 0.85 | GIH |
| 16  | 2462716  | 2582204  | 0.4979 | 119488  | 7     | 3.23E-02               | 0.95 | MAS |
| 16  | 2466655  | 2716804  | 0.5021 | 250149  | 43    | 2.53E-02               | 0.8  | CHB |
| 16  | 2466655  | 2665257  | 0.3583 | 198602  | 21    | 4.64E-02               | 0.9  | CHD |
| 16  | 2587877  | 2716804  | 0.3117 | 128927  | 43    | 1.95E-02               | 0.8  | MAS |
| 16  | 10816814 | 11432620 | 1.1110 | 615806  | 393   | 4.24E-02               | 0.2  | MEX |
| 16  | 13548359 | 13717292 | 0.3067 | 168933  | 118   | 4.43E-02               | 0.7  | CHD |
| 16  | 16161071 | 17820991 | 3.9103 | 1659920 | 608   | 4.40E-02               | 0.05 | CHB |
| 16  | 16190572 | 17614150 | 3.4628 | 1423578 | 478   | 1.13E-02               | 0.15 | CHD |
| 16  | 17350498 | 17437122 | 0.1937 | 86624   | 45    | 4.57E-02               | 0.85 | CHS |
| 16  | 21694617 | 22581356 | 0.8432 | 886739  | 135   | 1.09E-02               | 0.5  | CEU |
| 16  | 22847999 | 23024529 | 0.2653 | 176530  | 109   | 2.62E-02               | 0.4  | YRI |
| 16  | 23296041 | 23484768 | 0.2053 | 188727  | 74    | 1.51E-02               | 0.75 | TSI |
| 16  | 30435633 | 31101443 | 0.2609 | 665810  | 160   | 1.03E-02               | 0.75 | CHS |
| 16  | 30435773 | 31101443 | 0.1711 | 665670  | 134   | 2.86E-02               | 0.8  | CHB |
| 16  | 30435773 | 31098039 | 0.1708 | 662266  | 133   | 2.27E-02               | 0.8  | CHD |
| 16  | 30435773 | 31098039 | 0.1708 | 662266  | 133   | 3.63E-02               | 0.8  | JPT |
| 16  | 31844443 | 32066096 | 1.1384 | 221653  | 13    | 5.56E-03               | 0.9  | MAS |
| 16  | 32786914 | 33735555 | 3.9148 | 948641  | 6     | 4.42E-03               | 0.95 | MAS |
| 16  | 33756065 | 34069209 | 0.6162 | 313144  | 6     | 4.42E-02               | 0.95 | MAS |
| 16  | 46630304 | 47028216 | 0.1897 | 397912  | 140   | 2.09E-02               | 0.8  | JPT |
| 16  | 46643346 | 47028216 | 0.1787 | 384870  | 133   | 1.93E-02               | 0.8  | CHD |
| 16  | 46730905 | 47028216 | 0.1022 | 297311  | 111   | 1.03E-02               | 0.95 | CHB |
| 16  | 64345386 | 64441540 | 0.1947 | 96154   | 73    | 3.22E-02               | 0.85 | CHB |
| 16  | 64345386 | 64443954 | 0.2364 | 98568   | 75    | 4.15E-02               | 0.8  | CHD |
| 16  | 64345386 | 64443954 | 0.2364 | 98568   | 75    | 7.03E-03               | 0.9  | JPT |
| 16  | 64951891 | 68198345 | 1.2741 | 3246454 | 1017  | 4.47E-02               | 0.05 | CEU |
| 16  | 65700132 | 66902197 | 0.1356 | 1202065 | 319   | 2.17E-02               | 0.65 | CHD |
| 16  | 65701796 | 66901470 | 0.0612 | 1199674 | 354   | 4.63E-02               | 0.7  | CHS |
| 16  | 65729363 | 66582351 | 0.0988 | 852988  | 226   | 1.08E-02               | 0.85 | JPT |
| 16  | 65744712 | 66860911 | 0.1180 | 1116199 | 290   | 2.93E-02               | 0.7  | CHB |
| 16  | 65966681 | 66777470 | 0.1194 | 810789  | 218   | 3.80E-02               | 0.65 | MAS |
| 16  | 66049749 | 66247253 | 0.0479 | 197504  | 39    | 3.18E-02               | 0.9  | MEX |
| 16  | 77322312 | 77341734 | 0.5596 | 19422   | 12    | 3.83E-02               | 0.9  | CHS |
| 16  | 78324333 | 78505139 | 0.2315 | 180806  | 169   | 3.43E-02               | 0.55 | MEX |
| 16  | 81789713 | 81814269 | 0.3063 | 24556   | 27    | 3.60E-02               | 0.9  | CHB |
| 16  | 81789713 | 81816668 | 0.3348 | 26955   | 33    | 4.08E-02               | 0.85 | CHD |
| 17  | 10919861 | 10959235 | 0.1681 | 39374   | 15    | 4.77E-02               | 0.95 | CEU |
| 17  | 10919861 | 10968233 | 0.1991 | 48372   | 20    | 1.60E-02               | 0.9  | MEX |
| 17  | 10919861 | 10968233 | 0.1991 | 48372   | 20    | 3.51E-02               | 0.9  | TSI |
| 17  | 16366419 | 16412415 | 0.1447 | 45996   | 16    | 2.37E-02               | 0.95 | INS |

| chr | start    | end      | gened  | pyhsd   | n.snp | adjusted haploPS score | f    | pop |
|-----|----------|----------|--------|---------|-------|------------------------|------|-----|
| 17  | 16474703 | 18694595 | 2.0689 | 2219892 | 665   | 2.36E-02               | 0.1  | JPT |
| 17  | 18825740 | 19358320 | 0.4509 | 532580  | 109   | 4.09E-02               | 0.55 | TSI |
| 17  | 18864543 | 19141092 | 0.1736 | 276549  | 14    | 4.98E-02               | 0.75 | ASW |
| 17  | 18864543 | 19112789 | 0.1725 | 248246  | 6     | 3.56E-02               | 0.95 | LWK |
| 17  | 18864543 | 19141092 | 0.1736 | 276549  | 14    | 4.39E-02               | 0.8  | YRI |
| 17  | 19741141 | 20457372 | 0.2153 | 716231  | 130   | 3.34E-02               | 0.75 | CHB |
| 17  | 19744839 | 20457372 | 0.2111 | 712533  | 129   | 3.52E-02               | 0.75 | CHD |
| 17  | 19816932 | 20466453 | 0.6106 | 649521  | 132   | 2.13E-02               | 0.6  | CHS |
| 17  | 19816932 | 20455513 | 0.1867 | 638581  | 132   | 3.74E-02               | 0.7  | MAS |
| 17  | 24874328 | 26435699 | 0.2214 | 1561371 | 505   | 5.51E-03               | 0.45 | MAS |
| 17  | 24935404 | 25960929 | 0.2074 | 1025525 | 305   | 4.45E-02               | 0.45 | MEX |
| 17  | 25574940 | 26419872 | 0.2755 | 844932  | 218   | 4.71E-02               | 0.6  | CHB |
| 17  | 25577112 | 26419872 | 0.2719 | 842760  | 214   | 4.03E-02               | 0.6  | CHD |
| 17  | 27315068 | 27444641 | 0.1579 | 129573  | 25    | 9.04E-03               | 0.95 | MAS |
| 17  | 31097011 | 31310634 | 0.1996 | 213623  | 81    | 3.90E-02               | 0.7  | CEU |
| 17  | 31097011 | 31310634 | 0.1996 | 213623  | 81    | 1.07E-02               | 0.75 | TSI |
| 17  | 33323919 | 33746729 | 1.5324 | 422810  | 19    | 4.28E-02               | 0.7  | MAS |
| 17  | 50951865 | 51173778 | 0.6917 | 221913  | 151   | 3.62E-02               | 0.4  | INS |
| 17  | 51276135 | 51409524 | 0.0871 | 133389  | 67    | 4.79E-02               | 0.85 | CEU |
| 17  | 53206418 | 53607488 | 0.7899 | 401070  | 206   | 4.45E-02               | 0.4  | MAS |
| 17  | 53311424 | 53502268 | 0.3613 | 190844  | 71    | 4.34E-03               | 0.9  | JPT |
| 17  | 53315647 | 53435448 | 0.3022 | 119801  | 47    | 6.11E-03               | 0.9  | CHB |
| 17  | 53346331 | 53403839 | 0.2602 | 57508   | 30    | 2.28E-02               | 0.9  | CHS |
| 17  | 53356034 | 53435448 | 0.2624 | 79414   | 29    | 3.17E-02               | 0.9  | CHD |
| 17  | 55573663 | 56600056 | 0.2885 | 1026393 | 227   | 1.48E-02               | 0.65 | CHB |
| 17  | 55573663 | 56018758 | 0.1899 | 445095  | 116   | 4.48E-02               | 0.75 | CHS |
| 17  | 55947947 | 56595255 | 0.1907 | 647308  | 128   | 1.65E-02               | 0.8  | CHD |
| 17  | 55959243 | 56505015 | 0.1538 | 545772  | 118   | 3.50E-02               | 0.75 | MAS |
| 17  | 55999122 | 56179349 | 0.1279 | 180227  | 27    | 1.80E-02               | 0.95 | CEU |
| 17  | 55999122 | 56490310 | 0.1465 | 491188  | 89    | 4.61E-03               | 0.85 | GIH |
| 17  | 55999122 | 56179349 | 0.1279 | 180227  | 27    | 1.36E-03               | 0.95 | MEX |
| 17  | 55999122 | 56179349 | 0.1279 | 180227  | 27    | 1.61E-02               | 0.95 | TSI |
| 17  | 56018758 | 56164550 | 0.0747 | 145792  | 39    | 4.13E-02               | 0.9  | INS |
| 17  | 56192719 | 56332539 | 0.0250 | 139820  | 31    | 3.85E-02               | 0.95 | INS |
| 17  | 58321149 | 58902680 | 0.1648 | 581531  | 115   | 4.42E-02               | 0.8  | CHD |
| 17  | 58321902 | 58903970 | 0.2614 | 582068  | 133   | 3.71E-02               | 0.7  | CHS |
| 17  | 59019747 | 59119256 | 0.1923 | 99509   | 30    | 4.90E-02               | 0.9  | CHS |
| 17  | 59875697 | 60493874 | 0.4516 | 618177  | 124   | 3.26E-02               | 0.65 | JPT |
| 17  | 59935620 | 60411795 | 0.1906 | 476175  | 77    | 6.49E-03               | 0.8  | GIH |
| 17  | 59985216 | 60493874 | 0.2697 | 508658  | 88    | 6.29E-03               | 0.85 | CHD |
| 17  | 59985216 | 60103123 | 0.1399 | 117907  | 34    | 2.47E-02               | 0.95 | CHS |
| 17  | 59985216 | 60103123 | 0.1703 | 117907  | 34    | 1.43E-02               | 0.9  | MAS |
| 17  | 60590698 | 60794308 | 0.3313 | 203610  | 133   | 3.66E-02               | 0.55 | CEU |
| 17  | 61345212 | 61634187 | 0.1396 | 288975  | 121   | 4.67E-02               | 0.75 | MAS |
| 17  | 63206575 | 63658822 | 0.3658 | 452247  | 65    | 3.95E-02               | 0.65 | TSI |
| 18  | 6147072  | 6244886  | 0.3244 | 97814   | 29    | 5.64E-03               | 0.95 | CHB |
| 18  | 6147072  | 6244886  | 0.3244 | 97814   | 29    | 5.35E-03               | 0.95 | CHD |
| 18  | 6147072  | 6230094  | 0.2771 | 83022   | 27    | 8.49E-03               | 0.95 | JPT |
| 18  | 6175410  | 6244886  | 0.2632 | 69476   | 16    | 1.18E-02               | 0.95 | CEU |

| chr | start    | end      | gened  | pyhsd   | n.snp | adjusted haploPS score | f    | pop |
|-----|----------|----------|--------|---------|-------|------------------------|------|-----|
| 18  | 6175410  | 6230094  | 0.2159 | 54684   | 14    | 1.82E-02               | 0.95 | GIH |
| 18  | 6175410  | 6244886  | 0.2632 | 69476   | 16    | 2.09E-03               | 0.95 | MEX |
| 18  | 6175410  | 6244886  | 0.2632 | 69476   | 16    | 3.43E-02               | 0.9  | TSI |
| 18  | 7466415  | 7678197  | 0.3024 | 211782  | 120   | 2.67E-02               | 0.6  | CEU |
| 18  | 19465852 | 19883782 | 0.2365 | 417930  | 168   | 4.18E-02               | 0.55 | TSI |
| 18  | 30336115 | 30584024 | 0.2846 | 247909  | 104   | 2.96E-03               | 0.85 | CHS |
| 18  | 30337737 | 30593430 | 0.1036 | 255693  | 104   | 2.57E-02               | 0.85 | MAS |
| 18  | 30339720 | 30570172 | 0.1518 | 230452  | 89    | 3.74E-02               | 0.85 | CHB |
| 18  | 30367899 | 30579424 | 0.1469 | 211525  | 90    | 2.13E-02               | 0.75 | MEX |
| 18  | 30410744 | 30579424 | 0.1424 | 168680  | 74    | 3.77E-02               | 0.9  | JPT |
| 18  | 37545935 | 37604290 | 0.1786 | 58355   | 25    | 3.73E-02               | 0.9  | MAS |
| 18  | 64430875 | 64543625 | 0.2741 | 112750  | 67    | 2.65E-02               | 0.7  | GIH |
| 18  | 64780832 | 64928523 | 0.2159 | 147691  | 90    | 7.54E-04               | 0.85 | GIH |
| 18  | 64780832 | 64928523 | 0.2159 | 147691  | 90    | 4.92E-03               | 0.75 | MEX |
| 18  | 64785439 | 64922370 | 0.1994 | 136931  | 85    | 2.75E-04               | 0.9  | CEU |
| 18  | 64785439 | 64915926 | 0.1972 | 130487  | 80    | 2.35E-04               | 0.95 | TSI |
| 18  | 65840051 | 66022491 | 0.1899 | 182440  | 57    | 4.80E-02               | 0.85 | CHD |
| 19  | 1211286  | 1259057  | 0.2627 | 47771   | 19    | 1.76E-02               | 0.95 | CHS |
| 19  | 15186310 | 15431931 | 0.2384 | 245621  | 63    | 3.19E-02               | 0.45 | ASW |
| 19  | 15186310 | 15436801 | 0.2420 | 250491  | 64    | 4.41E-02               | 0.45 | LWK |
| 19  | 22522613 | 22789147 | 0.2334 | 266534  | 94    | 4.51E-02               | 0.65 | CEU |
| 19  | 22586511 | 23046994 | 0.1169 | 460483  | 147   | 4.66E-02               | 0.65 | INS |
| 19  | 42400700 | 43168897 | 0.2098 | 768197  | 238   | 2.88E-02               | 0.25 | ASW |
| 19  | 47285556 | 47598754 | 0.1358 | 313198  | 59    | 1.45E-02               | 0.6  | LWK |
| 19  | 47305035 | 47598754 | 0.1351 | 293719  | 56    | 2.38E-02               | 0.6  | MKK |
| 19  | 47473625 | 47574506 | 0.0756 | 100881  | 31    | 8.23E-03               | 0.7  | ASW |
| 19  | 47473625 | 47574506 | 0.0756 | 100881  | 31    | 1.41E-02               | 0.8  | YRI |
| 19  | 47568462 | 48034098 | 0.4441 | 465636  | 78    | 4.84E-02               | 0.7  | CHD |
| 19  | 47586321 | 48034098 | 0.4041 | 447777  | 72    | 3.25E-02               | 0.75 | CHB |
| 19  | 47586321 | 47895347 | 0.2689 | 309026  | 69    | 8.61E-03               | 0.75 | GIH |
| 19  | 47586321 | 48034098 | 0.4041 | 447777  | 72    | 1.57E-02               | 0.65 | MEX |
| 19  | 47586321 | 48034098 | 0.4041 | 447777  | 72    | 1.36E-03               | 0.8  | TSI |
| 19  | 47602928 | 48064226 | 0.3897 | 461298  | 70    | 4.44E-04               | 0.85 | CEU |
| 19  | 47605759 | 48034098 | 0.3771 | 428339  | 68    | 4.40E-02               | 0.75 | JPT |
| 20  | 7654428  | 7835679  | 0.2624 | 181251  | 68    | 3.38E-02               | 0.7  | CEU |
| 20  | 16442919 | 16458024 | 0.0670 | 15105   | 16    | 3.13E-02               | 0.9  | LWK |
| 20  | 16442919 | 16458024 | 0.0670 | 15105   | 16    | 6.70E-03               | 0.95 | YRI |
| 20  | 22434585 | 22540307 | 0.2153 | 105722  | 65    | 3.68E-02               | 0.7  | MEX |
| 20  | 22434585 | 22540307 | 0.2153 | 105722  | 65    | 2.02E-02               | 0.75 | TSI |
| 20  | 22436754 | 22529268 | 0.1485 | 92514   | 60    | 1.78E-03               | 0.9  | CEU |
| 20  | 24665867 | 24975078 | 0.3898 | 309211  | 187   | 2.82E-02               | 0.6  | CHS |
| 20  | 24745175 | 24980075 | 0.1381 | 234900  | 118   | 2.61E-02               | 0.85 | CHD |
| 20  | 24746856 | 24980075 | 0.1376 | 233219  | 117   | 4.04E-02               | 0.85 | CHB |
| 20  | 29982229 | 30569050 | 0.4041 | 586821  | 198   | 4.80E-02               | 0.55 | CHS |
| 20  | 29985593 | 30522023 | 0.3325 | 536430  | 174   | 1.21E-02               | 0.7  | CHD |
| 20  | 30959371 | 31254824 | 0.4295 | 295453  | 196   | 1.74E-02               | 0.6  | CHS |
| 20  | 30965993 | 31164994 | 0.3229 | 199001  | 146   | 4.11E-02               | 0.65 | CHD |
| 20  | 31155737 | 31254213 | 0.3162 | 98476   | 55    | 4.93E-02               | 0.65 | MEX |
| 20  | 33254942 | 34313778 | 0.2712 | 1058836 | 367   | 3.62E-02               | 0.5  | CHB |

| chr | start    | end      | gened  | pyhsd  | n.snp | adjusted haploPS score | f    | pop |
|-----|----------|----------|--------|--------|-------|------------------------|------|-----|
| 20  | 33618155 | 34331565 | 0.1765 | 713410 | 245   | 3.83E-02               | 0.65 | JPT |
| 20  | 33637025 | 34140324 | 0.0984 | 503299 | 160   | 2.97E-02               | 0.75 | CEU |
| 20  | 33657468 | 34291873 | 0.1078 | 634405 | 215   | 7.50E-03               | 0.65 | MEX |
| 20  | 33671011 | 33965521 | 0.0323 | 294510 | 92    | 4.33E-02               | 0.55 | ASW |
| 20  | 52491840 | 52648939 | 0.2776 | 157099 | 67    | 4.80E-02               | 0.8  | JPT |
| 20  | 52496348 | 52648939 | 0.2764 | 152591 | 65    | 3.98E-02               | 0.8  | CHD |
| 20  | 52496348 | 52557704 | 0.1550 | 61356  | 17    | 3.05E-02               | 0.95 | GIH |
| 20  | 52496348 | 52590434 | 0.1901 | 94086  | 28    | 4.50E-02               | 0.85 | TSI |
| 21  | 16750162 | 16923481 | 0.6172 | 173319 | 62    | 4.92E-03               | 0.85 | CHB |
| 21  | 16750162 | 16925832 | 0.3143 | 175670 | 54    | 4.06E-02               | 0.75 | MAS |
| 21  | 16752075 | 16768363 | 0.3072 | 16288  | 14    | 4.02E-02               | 0.9  | CEU |
| 21  | 16752075 | 16804202 | 0.3586 | 52127  | 21    | 4.53E-02               | 0.9  | CHD |
| 21  | 16752075 | 16765240 | 0.2857 | 13165  | 12    | 4.88E-02               | 0.9  | GIH |
| 21  | 16752075 | 16790643 | 0.3413 | 38568  | 19    | 1.95E-02               | 0.95 | JPT |
| 21  | 16752075 | 16768363 | 0.3072 | 16288  | 14    | 2.06E-02               | 0.9  | MEX |
| 21  | 16752075 | 16768363 | 0.3072 | 16288  | 14    | 3.55E-02               | 0.9  | TSI |
| 21  | 16755601 | 16925832 | 0.2946 | 170231 | 52    | 3.11E-02               | 0.7  | INS |
| 22  | 20683066 | 20724144 | 0.2329 | 41078  | 32    | 3.19E-02               | 0.9  | CHD |
| 22  | 20690650 | 20723606 | 0.1612 | 32956  | 33    | 3.00E-02               | 0.85 | INS |
| 22  | 20704853 | 20723606 | 0.2725 | 18753  | 25    | 1.68E-03               | 0.95 | MAS |
| 22  | 21366105 | 21725684 | 1.2891 | 359579 | 79    | 4.35E-02               | 0.55 | JPT |
| 22  | 24995807 | 25022186 | 0.2186 | 26379  | 33    | 9.02E-03               | 0.9  | MAS |
| 22  | 29863796 | 30767340 | 0.2579 | 903544 | 349   | 4.03E-02               | 0.2  | YRI |
| 22  | 31464399 | 31853431 | 0.6799 | 389032 | 278   | 3.00E-02               | 0.15 | LWK |
| 22  | 32377427 | 32645294 | 0.4662 | 267867 | 241   | 3.34E-02               | 0.2  | YRI |
| 22  | 34158300 | 34221048 | 0.5968 | 62748  | 5     | 4.35E-02               | 0.9  | YRI |
| 22  | 34871671 | 34977906 | 0.4734 | 106235 | 93    | 4.89E-02               | 0.65 | CHB |
| 22  | 37179366 | 37661254 | 0.6946 | 481888 | 168   | 4.25E-02               | 0.4  | MEX |
| 22  | 37964380 | 38213290 | 0.4260 | 248910 | 105   | 2.57E-02               | 0.7  | JPT |
| 22  | 38086931 | 38157499 | 0.2367 | 70568  | 37    | 4.81E-02               | 0.85 | CHS |
| 22  | 44988731 | 45199234 | 0.2027 | 210503 | 121   | 8.31E-04               | 0.95 | CHD |
| 22  | 45000658 | 45215256 | 0.3505 | 214598 | 118   | 1.10E-03               | 0.9  | CHB |
| 22  | 45000658 | 45202574 | 0.1787 | 201916 | 113   | 1.17E-03               | 0.95 | JPT |
| 22  | 45001048 | 45210629 | 0.2435 | 209581 | 116   | 1.48E-03               | 0.9  | CHS |
| 22  | 45001048 | 45063370 | 0.0266 | 62322  | 41    | 2.34E-02               | 0.95 | GIH |
| 22  | 45001048 | 45205702 | 0.1897 | 204654 | 113   | 9.32E-04               | 0.8  | MEX |
| 22  | 45005170 | 45210629 | 0.3331 | 205459 | 116   | 3.68E-04               | 0.9  | MAS |
| 22  | 45053267 | 45118765 | 0.1808 | 65498  | 17    | 5.11E-03               | 0.95 | INS |
| 22  | 48540686 | 48777213 | 0.3519 | 236527 | 68    | 3.65E-02               | 0.65 | TSI |
| 22  | 48550082 | 48777213 | 0.3224 | 227131 | 67    | 1.95E-02               | 0.7  | CEU |
| 22  | 48569166 | 48777213 | 0.3171 | 208047 | 60    | 2.45E-03               | 0.8  | MEX |

The start and end coordinates for each region are reported in NCBI Build 36 coordinates.

**Table S2. MIM Numbers for Genes Presented in Table 2**

| <b>Gene</b>     | <b>MIM ID</b> | <b>Gene</b>     | <b>MIM ID</b> | <b>Gene</b>     | <b>MIM ID</b> |
|-----------------|---------------|-----------------|---------------|-----------------|---------------|
| <i>ZMYM6</i>    | 613567        | <i>TUBB</i>     | 191130        | <i>BAI3</i>     | 602684        |
| <i>SFPQ</i>     | 605199        | <i>FLOT1</i>    | 606998        | <i>CUX2</i>     | 610648        |
| <i>ZMYM4</i>    | 613568        | <i>IER3</i>     | 602996        | <i>FAM109A</i>  | 614239        |
| <i>NCDN</i>     | 608458        | <i>DDR1</i>     | 600408        | <i>SH2B3</i>    | 605093        |
| <i>PSMB2</i>    | 602175        | <i>GTF2H4</i>   | 601760        | <i>ATXN2</i>    | 601517        |
| <i>TFAP2E</i>   | 614428        | <i>TFIIH</i>    | 189972        | <i>BRAP</i>     | 604986        |
| <i>LHX8</i>     | 604425        | <i>VARs2</i>    | 612802        | <i>ACAD10</i>   | 611181        |
| <i>ACMSD</i>    | 608889        | <i>DPCR1</i>    | 613928        | <i>ALDH2</i>    | 100650        |
| <i>CCNT2</i>    | 603862        | <i>HLA-C</i>    | 142840        | <i>MAPKAPK5</i> | 606723        |
| <i>RAB3GAP1</i> | 602536        | <i>HLA-B</i>    | 142830        | <i>ERP29</i>    | 602287        |
| <i>UBXD2</i>    | 611216        | <i>MICA</i>     | 600169        | <i>C12orf30</i> | 612755        |
| <i>LCT</i>      | 603202        | <i>HCP5</i>     | 604676        | <i>C12orf51</i> | 610762        |
| <i>MCM6</i>     | 601806        | <i>HLA-DOA</i>  | 142930        | <i>NAP1</i>     | 609916        |
| <i>DARS</i>     | 603084        | <i>HLA-DPA1</i> | 142880        | <i>TRAFD1</i>   | 613197        |
| <i>CXCR4</i>    | 162643        | <i>HLA-DPB1</i> | 142858        | <i>RPL6</i>     | 603703        |
| <i>OR13G1</i>   | 611677        | <i>COL11A2</i>  | 120290        | <i>PTPN11</i>   | 176876        |
| <i>UBD</i>      | 606050        | <i>RXRb</i>     | 180246        | <i>RHOJ</i>     | 607653        |
| <i>GABBR1</i>   | 603540        | <i>SLC39A7</i>  | 601416        |                 |               |
| <i>MOG</i>      | 159465        | <i>HSD17B8</i>  | 601417        |                 |               |
| <i>ZFP57</i>    | 612192        | <i>RING1</i>    | 602045        |                 |               |
| <i>HLA-F</i>    | 143110        | <i>VPS52</i>    | 603443        |                 |               |
| <i>HLA-G</i>    | 142871        | <i>RPS18</i>    | 180473        |                 |               |
| <i>HLA-A</i>    | 142800        | <i>B3GALT4</i>  | 603095        |                 |               |
| <i>HLA-H</i>    | 613609        | <i>WDR46</i>    | 611440        |                 |               |
| <i>ZNRD1</i>    | 607525        | <i>PFDN6</i>    | 605660        |                 |               |
| <i>PPP1R11</i>  | 606670        | <i>RGL2</i>     | 602306        |                 |               |
| <i>PPP1R10</i>  | 603771        | <i>TAPBP</i>    | 607081        |                 |               |
| <i>RNF39</i>    | 607524        | <i>ZBTB22</i>   | 611439        |                 |               |
| <i>TRIM31</i>   | 609316        | <i>DAXX</i>     | 603186        |                 |               |
| <i>TRIM10</i>   | 605701        | <i>KIFC1</i>    | 603763        |                 |               |
| <i>TRIM15</i>   | 126200        | <i>PHF1</i>     | 602881        |                 |               |
| <i>TRIM26</i>   | 600830        | <i>SYNGAP1</i>  | 603384        |                 |               |
| <i>TRIM39</i>   | 605700        | <i>BAK1</i>     | 600516        |                 |               |
| <i>GNL1</i>     | 143024        | <i>C6orf125</i> | 614461        |                 |               |
| <i>PRR3</i>     | 607147        | <i>ITPR3</i>    | 147267        |                 |               |
| <i>MRPS18B</i>  | 611982        | <i>SBP1</i>     | 610902        |                 |               |
| <i>DHX16</i>    | 603405        | <i>IP6K3</i>    | 606993        |                 |               |
| <i>MDC1</i>     | 607593        | <i>EYS</i>      | 612424        |                 |               |

MIM numbers for the genes present in the 10 regions identified by haploPS with positive selection signals in multiple populations, and where the haplotype similarity index (HSI) are less than 0.90. This indicates that the haplotypes carrying the advantageous variant(s) at each of these 10 regions in the different populations are significantly different and thus suggestive of convergent evolution of multiple mutation events, either at the same variant or at different variants in the same genomic region. This information is an extension of Table 2 in the main text.

**Table S3. Positive Selection Survey with Physical Distance**

| Chr       | Start       | End         | Adj. P-value          | Pop. | Frequency | Genes                                                                                                                                                                                                                                   |
|-----------|-------------|-------------|-----------------------|------|-----------|-----------------------------------------------------------------------------------------------------------------------------------------------------------------------------------------------------------------------------------------|
| <b>1</b>  | 171,791,702 | 173,246,946 | $1.17 \times 10^{-3}$ | ASW  | 0.15      | <i>SLC9A11, ANKRD45, KLHL20, CENPL, DARS2, GAS5, SNORD81, SNORD47, SNORD80, SNORD79, SNORD78, SNORD44, SNORD77, SNORD76, SNORD75, SNORD74, ZBTB37, DQ593451, SERPINC1, RC3H1, RABGAP1L, GPR52, IDN4-GGTR7, KIAA0471, CACYBP, MRPS14</i> |
|           | 172,215,955 | 173,189,969 | $2.04 \times 10^{-3}$ | CEU  | 0.50      |                                                                                                                                                                                                                                         |
|           | 171,881,574 | 173,299,764 | $1.75 \times 10^{-2}$ | CHB  | 0.30      |                                                                                                                                                                                                                                         |
|           | 172,148,516 | 173,303,662 | $4.28 \times 10^{-2}$ | CHD  | 0.35      |                                                                                                                                                                                                                                         |
|           | 172,148,516 | 173,288,426 | $2.24 \times 10^{-2}$ | CHS  | 0.35      |                                                                                                                                                                                                                                         |
|           | 172,150,698 | 173,189,969 | $5.09 \times 10^{-4}$ | GIH  | 0.50      |                                                                                                                                                                                                                                         |
|           | 172,170,360 | 173,217,691 | $1.64 \times 10^{-3}$ | INS  | 0.40      |                                                                                                                                                                                                                                         |
|           | 172,147,375 | 173,255,586 | $6.77 \times 10^{-3}$ | JPT  | 0.45      |                                                                                                                                                                                                                                         |
|           | 172,020,658 | 172,501,666 | $2.45 \times 10^{-2}$ | LWK  | 0.30      |                                                                                                                                                                                                                                         |
|           | 172,159,283 | 173,089,655 | $6.79 \times 10^{-3}$ | MAS  | 0.45      |                                                                                                                                                                                                                                         |
|           | 172,342,803 | 172,749,056 | $1.98 \times 10^{-2}$ | MKK  | 0.35      |                                                                                                                                                                                                                                         |
|           | 172,122,860 | 173,189,969 | $2.73 \times 10^{-4}$ | MXL  | 0.50      |                                                                                                                                                                                                                                         |
|           | 171,791,702 | 173,244,726 | $7.57 \times 10^{-7}$ | YRI  | 0.25      |                                                                                                                                                                                                                                         |
| <b>16</b> | 45,158,679  | 45,262,450  | $1.17 \times 10^{-3}$ | ASW  | 0.70      | <i>SHCBP1, VPS35, ORC6L, ORC6, MYLK3, C16orf87, GPT2, DNAJA2, NETO2, ITFG1</i>                                                                                                                                                          |
|           | 45,158,679  | 45,354,669  | $1.17 \times 10^{-3}$ | CEU  | 0.80      |                                                                                                                                                                                                                                         |
|           | 45,158,679  | 45,554,058  | $1.17 \times 10^{-3}$ | CHB  | 0.75      |                                                                                                                                                                                                                                         |
|           | 45,158,679  | 45,511,849  | $1.17 \times 10^{-3}$ | CHD  | 0.75      |                                                                                                                                                                                                                                         |
|           | 45,158,679  | 45,440,451  | $1.17 \times 10^{-3}$ | GIH  | 0.70      |                                                                                                                                                                                                                                         |
|           | 45,337,768  | 46,092,753  | $1.17 \times 10^{-3}$ | INS  | 0.45      |                                                                                                                                                                                                                                         |
|           | 45,365,022  | 45,827,459  | $1.17 \times 10^{-3}$ | JPT  | 0.80      |                                                                                                                                                                                                                                         |
|           | 45,580,279  | 45,825,707  | $1.17 \times 10^{-3}$ | MAS  | 0.75      |                                                                                                                                                                                                                                         |
|           | 45,158,679  | 45,354,669  | $1.17 \times 10^{-3}$ | MXL  | 0.75      |                                                                                                                                                                                                                                         |
|           | 45,158,679  | 45,354,669  | $1.17 \times 10^{-3}$ | TSI  | 0.75      |                                                                                                                                                                                                                                         |

Positive selected regions identified by haploPS analysis with the use of physical distance, where at least ten of the fourteen populations exhibit evidence of positive selection and the genomic regions have not been previously reported by positive selection surveys with LRH/iHS and XP-EHH. A genomic region that is positively selected in the three population panels in Phase 2 of the HapMap can artificially lower the extent of heterozygosity in the region, resulting in an underestimate of genetic recombination and hence genetic distance. As iHS, XP-EHH and haploPS rely on the population-averaged genetic distance from HapMap to quantify haplotype lengths, regions that are positively selected in all the populations will not be successfully identified by any of these metrics. We thus re-perform the haploPS analyses using physical distance to quantify haplotype length instead of genetic distance. Here, we prioritize the loci that emerged with evidence of positive selection in at ten of the fourteen populations (i.e. more than 70% of the populations), and have not been previously identified with the haploPS analysis using genetic distance. As the purpose is to discover novel selection regions that would not have been detected by metrics that rely on genetic distance, we also excluded regions that have emerged from previous reports on positive selection with LRH/iHS or XP-EHH<sup>10,14-17</sup>. Our analysis of positive selection with the use of physical distance identified two novel genomic regions that exhibited evidence of long haplotypes. The region on chromosome 1 spans between 171.8Mb and 173.2Mb, and the signal is found in 13 of the 14 populations (except TSI). The genes that are common to all 13 populations are the RAB GTPase-activating protein 1-like (*RABGAP1L*) and the G protein-coupled receptor 52 (*GPR52*). The second region is located on chromosome 16, spans between 45.1Mb and 46.0Mb, and the signal is found in 10 of the 14 populations (except CHS, LWK, MKK and YRI).

**Table S4. Segregation of Positively Selected Pigmentation Genes across Global Populations**

| Population | <i>KITLG</i> | <i>SLC24A5</i> | <i>ADAM17</i> | <i>ADAMTS20</i> | <i>HERC2/OCA2</i> |
|------------|--------------|----------------|---------------|-----------------|-------------------|
| CEU        | X            | X              |               |                 | X                 |
| TSI        | X            | X              |               |                 | X                 |
| MXL        | X            |                |               | X               | X                 |
| GIH        | X            | X              |               | X               |                   |
| INS        |              |                |               | X               |                   |
| CHB        | X            |                | X             | X               |                   |
| CHD        | X            |                | X             |                 |                   |
| CHS        | X            |                | X             |                 |                   |
| JPT        |              |                | X             | X               |                   |
| MAS        | X            |                |               |                 |                   |
| ASW        |              |                |               |                 |                   |
| LWK        |              |                |               |                 |                   |
| MKK        |              |                |               |                 |                   |
| YRI        |              |                |               |                 |                   |

Presence of haploPS positive selection signals at six skin pigmentation genes across the fourteen HapMap and SGVP populations. The pigmentation gene that is selected in a particular population is shown with an “X”. We surveyed six pigmentation genes that have been consistently identified by a variety of metrics for detecting positive selection in the ten non-African populations, and checked whether haploPS identified a selection signal in each of these genes for each of the populations. These genes are *KITLG*, *SLC24A5*, *ADAM17*, *ADAMTS20*, *OCA2* and *HERC2*. Under the assumption that haploPS is sufficiently sensitive to identify most of the positive selection signatures when they exist, we can evaluate whether certain pigmentation genes are selected only in some populations but not others. For example, haploPS identified selection signals at *ADAM17* in all four East Asian populations (CHB, CHD, CHS and JPT) but not the others, while *SLC24A5* was selected only in the Europeans (CEU, TSI) and Gujarati Indians (GIH). *HERC2* was selected only in the Europeans (CEU, TSI) and Mexicans (MXL). *KITLG* was selected in almost all the non-African populations except South Asian Indians (INS) and the Japanese (JPT). The distribution of the signal at *ADAMTS20* was less consistent, being selected in both Asian Indian populations (GIH, INS), a handful of East Asian populations (CHB, JPT), and the Mexicans (MXL).

**Table S5. False Positive Rates (FPRs) of the Different LRH Methods for Detecting Positive Selection in Simulated Populations with Bottlenecks**

| Inbreeding coefficient | haploPS (1%) | iHS   | XP-EHH |
|------------------------|--------------|-------|--------|
| <b>0.1</b>             | 0%           | 43.7% | 6.3%   |
| <b>0.2</b>             | 1.2%         | 27.4% | 7.1%   |
| <b>0.3</b>             | 6.7%         | 16.8% | 9.7%   |

To evaluate the effects of bottlenecks on haploPS, a range of simulations with different bottleneck intensities was performed. The simulation was performed using the program *cosi* ([http://www.broadinstitute.org/~sfs/cosi/cosi\\_1.2.tar](http://www.broadinstitute.org/~sfs/cosi/cosi_1.2.tar)). The three population model is similar to the “cosi” demographic model, except there was no migration and the population size is kept constant at 10,000. A single bottleneck was introduced into the European population 1,950 generations before the split between Europe and Asia. We simulated 1,000 regions of 100kb for each bottleneck intensity setting. Three bottleneck intensities were employed with corresponding inbreeding coefficients of 0.1, 0.2 and 0.3. The same 2,000 null simulations for generating the null distribution of haploPS scores in the power simulations were used to identify the haploPS threshold for defining significance. The haploPS scores that corresponded to the bottom 1% of the score distribution in the 2,000 null simulations for Africa were used as the thresholds. In the simulations with bottlenecks, any region with a haploPS score below each of these thresholds will be considered a false positive finding. The false positive rate is defined as the proportion of the 1,000 simulated regions with a significant finding. The same approach of comparing against the null distributions of iHS and XP-EHH were used to generate the threshold for defining significance at the top 1% of the respective distributions.



## References

1. Frazer, K.A. *et al.* A second generation human haplotype map of over 3.1 million SNPs. *Nature* 449, 851-61 (2007).
2. Stephens, M., Smith, N.J. & Donnelly, P. A new statistical method for haplotype reconstruction from population data. *Am J Hum Genet* 68, 978-89 (2001).
3. Marchini, J. *et al.* A comparison of phasing algorithms for trios and unrelated individuals. *Am J Hum Genet* 78, 437-50 (2006).
4. Altshuler, D.M. *et al.* Integrating common and rare genetic variation in diverse human populations. *Nature* 467, 52-8 (2010).
5. Howie, B.N., Donnelly, P. & Marchini, J. A flexible and accurate genotype imputation method for the next generation of genome-wide association studies. *PLoS Genet* 5, e1000529 (2009).
6. Teo, Y.Y. *et al.* Singapore Genome Variation Project: a haplotype map of three Southeast Asian populations. *Genome Res* 19, 2154-62 (2009).
7. Scheet, P. & Stephens, M. A fast and flexible statistical model for large-scale population genotype data: applications to inferring missing genotypes and haplotypic phase. *Am J Hum Genet* 78, 629-44 (2006).
8. McVean, G.A. *et al.* The fine-scale structure of recombination rate variation in the human genome. *Science* 304, 581-4 (2004).
9. Jallow, M. *et al.* Genome-wide and fine-resolution association analysis of malaria in West Africa. *Nat Genet* (2009).
10. Sabeti, P.C. *et al.* Positive natural selection in the human lineage. *Science* 312, 1614-20 (2006).
11. Clark, T.G. *et al.* Tumor necrosis factor and lymphotoxin-alpha polymorphisms and severe malaria in African populations. *J Infect Dis* 199, 569-75 (2009).
12. A global network for investigating the genomic epidemiology of malaria. *Nature* 456, 732-7 (2008).
13. Piel, F.B. *et al.* Global distribution of the sickle cell gene and geographical confirmation of the malaria hypothesis. *Nat Commun* 1, 104 (2010).
14. Sabeti, P.C. *et al.* Detecting recent positive selection in the human genome from haplotype structure. *Nature* 419, 832-7 (2002).
15. Voight, B.F., Kudravalli, S., Wen, X. & Pritchard, J.K. A map of recent positive selection in the human genome. *PLoS Biol* 4, e72 (2006).
16. Grossman, S.R. *et al.* A composite of multiple signals distinguishes causal variants in regions of positive selection. *Science* 327, 883-6 (2010).
17. Sabeti, P.C. *et al.* Genome-wide detection and characterization of positive selection in human populations. *Nature* 449, 913-8 (2007).
